# Supplementary material for: A Robust Gene Expression Prognostic Signature for Overall Survival in High-Grade Serous Ovarian Cancer
Source: J Oncol. 2019 Nov 7;2019:3614207. doi: 10.1155/2019/3614207 (PMC6925684; doi:10.1155/2019/3614207)
Supplement: Supplementary Materials — Table S1: summary of independent validation of the 11-gene signature in 9 datasets. Table S2: list of genes that are consistently deregulated in HGSOC across six datasets using criteria: adjusted p < 0.05 and fold change >1.5. Table S3: the impact of deregulated genes on overall survival (OS). Genes significantly associated with OS are highlighted in yellow. Table S4: top 20 altered gene clusters identified in the 232 deregulated genes that are significantly associated with OS. Gene set enrichment analysis was conducted using Metascape (http://metascape.org). Count represents the number of genes with membership in the given ontology term. “%” represents the percentage of total 232 genes associated with OS that are found in the given ontology term. Log10 (p) is the p-value in log base 10. Table S5: frequency by which each gene appeared in the Cox regression model among 100 resampling training sets. The signature genes are highlighted in yellow. Table S6: the function and role of 11 genes in the prognostic signature in normal and HGSOC cells. Table S7: the average Cox regression coefficient for each gene used to calculate the prognostic score. [file 3614207.f1.zip]

Archive with 7 entries (7 files):
- 3614207.f1/Supplementary Table 1.docx
- 3614207.f1/Supplementary Table 2.xlsx
- 3614207.f1/Supplementary Table 3.xlsx
- 3614207.f1/Supplementary Table 4.xlsx
- 3614207.f1/Supplementary Table 5.xlsx
- 3614207.f1/Supplementary Table 6.docx
- 3614207.f1/Supplementary Table 7.xlsx
