# Supplementary material for: A Robust Gene Expression Prognostic Signature for Overall Survival in High-Grade Serous Ovarian Cancer
Source: J Oncol. 2019 Nov 7;2019:3614207. doi: 10.1155/2019/3614207 (PMC6925684; doi:10.1155/2019/3614207)
Supplement: Supplementary Materials — Table S1: summary of independent validation of the 11-gene signature in 9 datasets. Table S2: list of genes that are consistently deregulated in HGSOC across six datasets using criteria: adjusted p < 0.05 and fold change >1.5. Table S3: the impact of deregulated genes on overall survival (OS). Genes significantly associated with OS are highlighted in yellow. Table S4: top 20 altered gene clusters identified in the 232 deregulated genes that are significantly associated with OS. Gene set enrichment analysis was conducted using Metascape (http://metascape.org). Count represents the number of genes with membership in the given ontology term. “%” represents the percentage of total 232 genes associated with OS that are found in the given ontology term. Log10 (p) is the p-value in log base 10. Table S5: frequency by which each gene appeared in the Cox regression model among 100 resampling training sets. The signature genes are highlighted in yellow. Table S6: the function and role of 11 genes in the prognostic signature in normal and HGSOC cells. Table S7: the average Cox regression coefficient for each gene used to calculate the prognostic score. [file 3614207.f1.zip › 3614207.f1/Supplementary Table 2.xlsx]

## Sheet: Sheet1
Supplementary Table 2 List of genes that are consistently deregulated in HGSOC across six datasets using criteria: adjusted p<0.05 and Fold change >1.5
		GSE18520		GSE26712		GSE40595		GSE38666		GSE27651		GSE6008
Affymetrix probe ID	Gene symbol	adjusted P Value	logFC	adjusted P Value	logFC	adjusted P Value	logFC	adjusted P Value	logFC	adjusted P Value	logFC	adjusted P Value	logFC
209613_s_at	ADH1B	1.54e-17	-5.76896	2.09e-11	-3.66243	2.42e-24	-8.25794	4.87e-08	-6.64103	1.26e-05	-5.55343	1.71e-06	-0.734
219355_at	CXorf57	4.59e-13	-3.11434	1.05e-24	-1.39044	2.26e-19	-3.30765	1.3e-06	-3.56741	9.97e-06	-2.76993	1.24e-07	-0.887
201761_at	MTHFD2	2.84e-07	2.07612	8.02e-06	1.8557	0.000438	1.82671	8.8e-06	2.84102	1.3e-09	3.57227	2.05e-05	0.645
204754_at	HLF	1.93e-05	-1.34578	6.24e-09	-0.833523	1.33e-08	-1.30858	3.92e-05	-3.01255	4.51e-08	-3.31709	2.05e-15	-0.942
202107_s_at	MCM2	2.29e-07	2.11623	7.54e-08	1.4803	7.65e-05	1.71279	1.02e-05	1.69665	1.8e-09	3.50633	0.00244	0.484
219368_at	NAP1L2	6.55e-10	-2.35605	5.98e-27	-1.39033	4.94e-12	-2.92513	3.79e-05	-3.18503	0.00385	-1.7653	5.69e-06	-0.482
202589_at	TYMS	0.000489	1.57421	0.0041	0.999718	0.0296	1.17405	0.00327	1.78891	0.000151	2.66395	7.26e-05	0.722
221591_s_at	FAM64A	1.08e-05	1.11016	1.67e-09	1.00193	1.42e-05	1.34274	7.49e-05	2.85029	1.53e-05	2.0935	0.00218	0.337
202036_s_at	SFRP1	4.26e-18	-3.22066	1.05e-13	-2.11167	5.61e-14	-3.91601	0.000421	-2.73301	5.36e-07	-3.92311	0.0499	-0.337
218755_at	KIF20A	2.66e-11	2.56023	1.29e-06	1.20236	8.08e-06	1.87387	1.09e-08	3.53867	1.36e-07	3.82216	0.000974	0.613
210139_s_at	PMP22	3.23e-12	-3.18277	2.98e-07	-1.76153	2.05e-11	-4.2701	1.24e-06	-3.35155	0.000153	-1.68298	1.87e-05	-0.871
220638_s_at	CBLC	0.000399	0.883664	1.29e-06	1.09407	0.00391	0.737041	0.0229	1.21203	0.00308	1.43215	0.0276	0.342
219849_at	ZNF671	1.97e-09	-0.913746	3.36e-05	-0.487824	5.66e-14	-1.49363	0.00622	-1.33152	0.000196	-0.8809	0.0454	-0.188
205751_at	SH3GL2	2.58e-09	-1.61715	5.98e-18	-1.0154	1.49e-06	-2.09467	4.55e-05	-3.10259	0.0278	-1.80778	0.00599	-0.224
212607_at	AKT3	2.83e-09	-2.65394	2.97e-14	-1.7275	4.92e-08	-2.27359	6.35e-06	-2.42421	0.00092	-1.91173	6.09e-05	-0.701
218662_s_at	NCAPG	1.35e-10	2.45108	0.00316	0.773756	5.95e-06	2.15119	1.26e-07	3.09268	3.89e-06	3.30898	0.00271	0.413
215133_s_at	LOC102725213///LOC100507387///FAM153A///FAM153B	1.29e-13	-1.84727	1.78e-17	-0.762697	1.97e-13	-2.29607	0.000164	-1.83728	5.78e-06	-1.6845	0.000197	-0.488
209550_at	NDN	3.65e-06	-2.15996	4.76e-07	-1.7097	3.11e-10	-3.86664	2.87e-05	-3.49892	0.0324	-2.07094	0.000275	-0.728
204753_s_at	HLF	0.00779	-0.649103	1.35e-08	-0.958459	4.92e-12	-2.2468	5.82e-06	-3.59561	1.7e-06	-2.5109	9.33e-15	-1.07
33323_r_at	SFN	2.17e-05	1.65397	0.0208	0.831725	0.000411	1.9333	5.26e-07	3.15612	0.000569	2.40077	0.000153	0.794
221766_s_at	FAM46A	0.00201	-0.750262	5.67e-06	-1.01923	7.05e-09	-2.3444	0.000259	-2.29047	0.00344	-1.0901	3.41e-07	-0.673
203439_s_at	STC2	8.66e-07	1.84293	5.62e-06	0.619657	0.00609	1.21211	0.000477	2.12816	9.34e-05	2.40718	0.00815	0.228
219747_at	NDNF	4.45e-06	-1.54008	2.64e-15	-1.79554	1.06e-12	-3.02098	6.06e-06	-3.45068	3.76e-08	-2.54279	3.02e-18	-1
203022_at	RNASEH2A	8.25e-10	1.56744	8.63e-07	1.19907	0.00167	1.26794	0.000137	2.34906	0.00691	1.22881	0.0235	0.267
209200_at	MEF2C	1.2e-07	-1.91346	2.34e-15	-2.01228	7e-10	-3.03227	1.12e-05	-2.56302	4.52e-05	-1.90247	2.09e-07	-1.26
209168_at	GPM6B	6.02e-11	2.2767	1.1e-08	0.828465	1.34e-05	1.36122	0.00872	1.3498	0.000137	1.8622	0.0151	0.27
205394_at	CHEK1	8.05e-06	1.27177	0.000779	0.382434	0.00138	1.5632	5.37e-06	2.3048	2.11e-05	2.01531	0.0006	0.327
212556_at	SCRIB	0.00584	0.92609	0.000339	1.06562	0.00369	1.00249	3.6e-06	2.41934	2.62e-06	2.3553	1.67e-06	0.614
219752_at	RASAL1	1.79e-07	1.60227	2.17e-12	0.975939	1.62e-08	1.27136	2.12e-05	3.2014	0.00131	1.08938	0.00394	0.309
208711_s_at	CCND1	1.97e-05	1.72795	0.000923	0.843249	0.00311	1.35683	0.01	1.37874	0.0258	1.89785	0.00809	0.654
204646_at	DPYD	2.02e-08	-3.21448	4.17e-27	-3.72056	6.33e-09	-5.17647	3.42e-09	-3.69171	0.000921	-3.11544	0.0154	-0.397
202158_s_at	CELF2	8.24e-11	-2.02656	7.91e-27	-1.89417	7.27e-10	-3.68296	4.99e-08	-2.63354	4.17e-05	-2.19776	1.36e-05	-0.556
218677_at	S100A14	8.24e-06	2.11802	0.000101	1.18498	0.000846	1.59959	0.00252	1.53714	0.000227	3.27506	3.47e-05	0.91
204603_at	EXO1	0.00708	0.528112	0.000384	0.467194	8e-11	1.31286	2.94e-05	2.46143	0.0116	0.502415	0.00513	0.358
200811_at	CIRBP	6.94e-05	-1.18504	2.8e-06	-1.34035	3e-07	-2.31337	0.00104	-1.82936	0.0124	-1.21617	1.13e-05	-0.619
218829_s_at	CHD7	2.07e-07	1.58821	0.0159	0.70187	0.00301	1.02363	0.0014	1.63419	3.27e-05	2.58239	4.8e-09	0.724
203713_s_at	LLGL2	7.4e-05	1.53861	8.27e-05	0.852239	0.00865	0.654598	0.00153	1.72522	0.0024	1.14162	9.19e-09	0.74
212771_at	FAM171A1	5.64e-06	1.62602	2.58e-09	1.29241	0.000446	1.05431	3.52e-05	1.92661	7.46e-05	2.72766	0.0129	0.253
201843_s_at	EFEMP1	3.14e-10	-4.42294	6.58e-24	-3.89742	1.01e-12	-6.91817	4.99e-08	-4.87557	0.000139	-2.85077	0.000152	-0.677
203799_at	LY75-CD302///CD302///LY75	2.16e-10	-2.44761	7.81e-08	-1.71131	3.05e-13	-3.98459	3.05e-05	-2.02188	0.000112	-2.05411	1.78e-11	-0.935
204124_at	SLC34A2	0.000404	1.27646	6.59e-05	1.33975	0.00104	2.05303	6.05e-05	2.27403	0.00176	1.86983	1.17e-07	1.29
222039_at	KIF18B	4.86e-08	1.35865	3.93e-08	0.859995	0.000259	1.43735	2e-08	2.736	1.69e-06	2.66171	0.000752	0.359
209642_at	BUB1	4.26e-11	2.55435	1.31e-05	1.27499	5.08e-05	2.14994	6.83e-08	4.32381	5.53e-09	3.48693	0.0101	0.504
219215_s_at	SLC39A4	1.41e-10	1.85912	1.65e-09	2.04217	2e-08	2.27719	2.55e-05	2.14366	3.26e-05	1.91601	0.00499	0.506
204058_at	ME1	5.16e-09	-2.44007	1.32e-21	-1.42515	1.86e-14	-3.39414	0.00127	-1.8984	6.41e-05	-2.61964	0.00321	-0.292
209505_at	NR2F1	2.23e-06	-2.19104	2.25e-13	-2.69013	5.91e-09	-4.50841	0.0115	-1.29663	0.00896	-2.66565	0.00859	-0.509
203999_at	SYT1	0.00286	-0.784219	7.96e-07	-0.857069	1.64e-09	-2.08658	0.0031	-2.58569	0.00755	-1.40981	0.036	-0.188
201990_s_at	CREBL2	2.93e-06	-1.41494	1.06e-30	-2.82338	1.55e-09	-3.12748	4.73e-06	-1.69446	0.0113	-1.02489	0.000536	-0.324
213947_s_at	NUP210	0.00116	0.953339	0.000567	0.631514	0.000892	0.914794	0.014	1.63596	0.00135	1.59368	2.59e-05	0.548
222036_s_at	MCM4	4.83e-08	1.75796	2.14e-06	1.34405	0.00029	1.31144	1.07e-06	1.78093	3.98e-09	2.90501	0.000817	0.413
217764_s_at	RAB31	1.27e-05	-1.49231	6.66e-05	-1.38044	2.13e-09	-3.27112	2.28e-05	-1.571	0.0316	-1.41067	0.0291	-0.388
202157_s_at	CELF2	7.3e-08	-2.25571	6.49e-15	-2.20704	1.26e-14	-4.49579	3.21e-09	-3.70131	0.00455	-2.08517	0.000152	-0.586
209458_x_at	HBA2///HBA1	3.52e-18	-3.85445	6.67e-05	-2.57471	3.84e-18	-5.80202	0.00953	-1.54534	1.23e-06	-3.94449	6.78e-05	-0.816
213939_s_at	RUFY3	6.54e-10	-1.93076	1.47e-15	-1.97986	1.58e-15	-3.48459	1.22e-05	-1.8943	0.000719	-1.75047	3.8e-05	-0.527
201510_at	ELF3	5.76e-11	2.30264	5.64e-08	1.7143	7.36e-07	2.42023	0.000223	2.03125	9.76e-06	3.09639	7.97e-08	0.932
213201_s_at	TNNT1	0.00084	1.712	2.78e-05	1.72484	0.000246	2.10083	0.000877	3.18145	0.00265	2.63536	0.00176	0.988
205240_at	GPSM2	0.000113	1.3351	7.02e-10	0.833447	0.00129	0.982318	0.000917	2.36594	2.7e-05	1.47897	0.00246	0.619
204514_at	DPH2	8.09e-07	0.870028	1.85e-05	0.530749	0.000411	0.502762	0.0194	0.830193	0.000374	1.14228	0.0176	0.255
215729_s_at	VGLL1	1.11e-05	2.76005	0.00938	0.864426	0.0111	1.81817	0.0381	2.07816	0.00208	3.19302	0.0453	0.617
211745_x_at	HBA2///HBA1	1.88e-19	-3.8827	7.48e-06	-2.88317	2.04e-18	-6.12666	0.02	-1.37571	7.15e-07	-4.07219	2.37e-05	-0.837
218542_at	CEP55	1.31e-10	2.97779	5.05e-05	1.38331	1.05e-05	3.07357	6.33e-05	2.9192	6.99e-10	3.90949	0.000234	0.804
214414_x_at	HBA2///HBA1	1.1e-11	-2.36077	1.5e-07	-3.57167	9.09e-16	-6.60992	3.33e-05	-4.79828	5.24e-07	-3.82966	0.00108	-0.891
214841_at	CNIH3	0.00134	-0.825865	1.75e-16	-0.70796	1.18e-09	-1.82122	0.0479	-0.930791	0.00377	-1.25399	0.0175	-0.244
220543_at	C21orf62	3.5e-12	-1.83212	9.76e-40	-2.11256	3.96e-23	-3.85618	9.14e-07	-3.11939	7.16e-07	-1.98218	1.02e-05	-0.445
218009_s_at	PRC1	6.91e-09	2.27698	7.95e-06	1.39344	9.82e-05	2.15123	1.95e-06	2.57873	4.61e-08	3.22562	0.0382	0.365
210602_s_at	CDH6	4.21e-06	1.17921	0.00314	0.975705	0.000251	1.362	0.0126	1.6346	0.00411	1.2731	0.0123	0.682
205533_s_at	CDH6	9.97e-09	2.22667	0.00478	0.546015	0.00119	1.49353	0.000157	3.24551	0.000411	2.45042	0.00353	0.475
213624_at	SMPDL3A	2.09e-05	-1.58713	3.15e-05	-0.888029	3.18e-09	-1.79843	0.00512	-1.71548	0.0373	-1.50206	8.72e-05	-0.452
202094_at	BIRC5	2.69e-05	1.04854	1.54e-08	0.846408	1.32e-08	1.8148	0.000117	2.73501	0.00719	0.970947	3.82e-05	0.617
221771_s_at	MPHOSPH8	6.72e-06	-1.19758	0.000735	-0.726619	1.76e-10	-2.60897	0.0406	-0.956038	0.0339	-0.765823	7.67e-06	-0.492
218585_s_at	DTL	2.61e-10	2.47193	2.27e-08	1.22035	1.92e-07	2.25595	1.53e-09	3.27463	5.07e-08	3.45605	0.00299	0.468
204086_at	PRAME	2.25e-07	2.80315	6.19e-05	1.70979	0.000318	2.22175	1.05e-06	3.74295	0.0016	3.56467	0.0196	0.675
215342_s_at	RABGAP1L	1.53e-05	-0.937873	1.62e-07	-0.7672	6.82e-08	-1.33816	0.00223	-2.22732	0.0401	-0.604239	0.0104	-0.266
218883_s_at	CENPU	9.72e-08	2.07509	0.000602	1.07886	0.00374	1.43413	1.23e-06	1.90838	3.52e-07	3.54067	0.0182	0.333
202720_at	TES	3.24e-05	1.08705	0.00356	0.67139	0.00255	0.962741	0.0321	0.976141	0.00092	1.29114	9.11e-05	0.455
209911_x_at	HIST1H2BD	4.47e-05	1.51979	0.0187	0.763174	0.00935	1.00394	0.00345	1.23563	0.00133	2.09877	0.0224	0.423
206167_s_at	ARHGAP6	1.57e-10	-2.98975	3.13e-20	-2.24395	1.78e-17	-4.34166	0.0109	-1.18101	0.000446	-2.61894	1.99e-12	-0.886
219332_at	MICALL2	4.55e-06	1.12858	9.62e-05	0.774613	0.0251	0.916578	6.71e-06	3.3435	0.000461	1.38541	0.000393	0.382
201842_s_at	EFEMP1	6.58e-09	-3.86395	7.96e-14	-4.18304	6.51e-11	-7.34757	1.26e-09	-4.9112	0.00618	-3.54278	9.92e-05	-1.23
205501_at	PDE10A	0.0315	-0.649967	3.49e-09	-0.70687	2.77e-08	-2.72435	1.46e-05	-1.84515	0.00291	-1.22945	4.01e-07	-0.369
204480_s_at	C9orf16	6.58e-05	1.16704	6.63e-25	2.80995	0.00615	0.785948	0.0131	1.6535	0.000284	1.83243	0.000707	0.344
208824_x_at	CDK16	0.00213	1.05086	1.4e-09	1.47268	0.00447	0.737981	0.00658	1.28689	0.0025	1.646	0.00876	0.434
204041_at	MAOB	6.77e-06	-1.83573	7.13e-08	-1.48253	9.25e-08	-2.66244	0.000464	-2.97841	0.0151	-1.76628	1.22e-06	-1.31
212157_at	SDC2	0.000536	-0.972256	8.7e-07	-0.870643	1.3e-06	-1.8733	0.000208	-1.7763	0.0252	-1.41524	1.77e-09	-0.702
219855_at	NUDT11	0.00211	-0.801142	0.000326	-0.617288	1.64e-05	-0.831832	0.0163	-1.69734	0.0185	-0.571994	2.77e-06	-0.76
212095_s_at	MTUS1	7.83e-10	-1.38945	4.6e-38	-1.87064	6.42e-12	-1.87328	0.00462	-1.78099	0.00412	-1.36094	0.00192	-0.359
207828_s_at	CENPF	1.43e-07	2.32862	2.01e-06	1.33642	1.3e-09	2.80832	1.55e-06	2.54169	0.000121	2.5248	0.00751	0.521
209771_x_at	CD24	8.76e-14	3.14134	4.5e-20	4.14846	2.06e-11	4.55281	6.55e-05	4.1053	8.78e-06	3.47808	9.72e-21	1.84
206074_s_at	HMGA1	4.4e-26	4.7378	1.15e-13	2.46952	4.36e-07	1.86958	1.43e-07	3.61367	8.75e-06	2.53201	1.83e-09	1.21
214435_x_at	RALA	1.2e-07	1.64983	0.000479	0.802768	0.0069	1.03922	0.0246	1.06715	0.000384	2.0906	0.00778	0.285
214724_at	DIXDC1	2.65e-09	-0.93899	3.41e-14	-1.38186	3.65e-17	-3.21415	1.34e-07	-3.38664	5.75e-05	-1.55374	0.00123	-0.343
212745_s_at	BBS4	0.00582	-0.600684	9.24e-18	-0.78191	4.52e-11	-1.79137	0.000924	-2.5818	0.00412	-0.95241	3.38e-05	-0.488
211276_at	TCEAL2	1.13e-18	-3.80545	4.89e-22	-4.06643	2.49e-20	-6.45539	3.63e-06	-4.34129	3.04e-06	-4.08264	2.55e-05	-1.02
221895_at	MOSPD2	0.000484	-1.13882	3.34e-24	-1.07368	1.41e-05	-0.888922	0.0117	-1.4058	0.00534	-0.935209	0.0322	-0.158
215261_at		0.00683	0.42689	2.63e-06	0.568567	9.01e-05	0.556271	0.0206	1.18732	0.0146	0.459709	0.00231	0.387
214591_at	KLHL4	0.00101	-0.618556	0.0355	-0.240352	4.15e-06	-0.696904	0.00855	-1.46801	0.000285	-0.98493	1.17e-08	-0.48
219304_s_at	PDGFD	1.11e-13	-3.27302	2.64e-20	-2.99789	5.78e-22	-5.762	1.86e-07	-4.32112	0.00107	-3.18844	2.72e-12	-0.97
220789_s_at	SNORA5B///TBRG4	0.00338	0.793139	6.36e-08	0.759988	0.000236	0.578241	0.016	1.4071	0.000819	1.10431	0.013	0.241
209053_s_at	WHSC1	1.82e-05	1.29585	1.91e-05	0.903204	0.0011	1.2289	1.12e-05	2.17881	0.00311	1.39685	0.0369	0.687
206125_s_at	KLK8	5.62e-07	2.4366	1.41e-09	2.03196	0.000412	1.41315	2.12e-06	3.17821	3e-05	3.36779	8.02e-15	1.85
204082_at	PBX3	8.78e-09	-1.6003	1.2e-08	-1.38027	3.59e-12	-2.89829	0.000176	-1.56913	0.00431	-1.45002	1.09e-11	-0.79
213675_at	PARVA	7.34e-16	-2.12788	4.73e-16	-1.76259	1.54e-14	-2.81098	0.00404	-1.10189	0.00377	-1.23934	1.08e-05	-0.429
210757_x_at	LOC101926921///DAB2	1.26e-08	-1.32647	6.41e-07	-1.27161	1.02e-17	-3.23814	6.17e-05	-1.8352	6.78e-06	-2.323	0.0227	-0.316
209568_s_at	RGL1	0.0476	-0.350725	8.49e-17	-1.67956	1.65e-09	-3.07413	0.000891	-1.37726	0.0367	-1.13752	0.0171	-0.302
219791_s_at	HAND2-AS1	1.95e-18	-2.60187	1.54e-20	-1.4749	9.45e-27	-3.46414	1.83e-05	-3.91011	1.06e-08	-3.00201	2.01e-07	-0.814
213520_at	RECQL4	9.69e-09	0.995448	8.74e-07	0.918522	0.000376	0.94769	5.78e-05	2.45831	8.84e-05	1.1631	0.00675	0.46
212764_at	ZEB1	8.26e-05	-1.86955	0.000482	-1.28502	5.02e-09	-3.66846	0.00419	-1.74821	0.0484	-1.53846	3.2e-05	-0.568
215395_x_at	PRSS3P2	8.93e-05	0.660588	2.41e-06	0.653492	0.000159	0.655837	0.0017	1.45403	0.035	0.624517	0.000369	0.353
201394_s_at	RBM5	0.00241	-0.404504	3.57e-06	-1.08666	1.47e-08	-1.79752	0.0122	-1.55497	0.00196	-0.935977	0.000107	-0.382
219895_at	TMEM255A	1.69e-13	-4.50095	5.4e-56	-3.32769	5.55e-17	-5.66691	2.89e-07	-4.19959	0.000321	-3.84631	5.6e-07	-0.666
203131_at	PDGFRA	3.12e-06	-1.94644	7.73e-05	-1.87781	3.53e-10	-4.34986	0.0117	-2.08106	0.0015	-2.34244	1.03e-09	-1.15
205234_at	SLC16A4	6.73e-06	-2.6287	0.000828	-0.397019	4.19e-09	-1.91668	0.01	-1.88125	0.000343	-1.49142	0.000107	-0.609
212096_s_at	MTUS1	5.74e-09	-1.94388	5.4e-19	-2.46268	8.2e-13	-3.93433	1.02e-08	-3.15398	0.00042	-1.74238	1.37e-07	-0.809
214058_at	MYCL	6.16e-05	1.52682	0.000328	0.934806	3.75e-05	1.72871	0.0185	1.38269	0.00475	1.9247	0.000238	0.77
221927_s_at	ABHD11	4.05e-07	1.1961	2.28e-13	1.99888	1.21e-07	1.66064	4.01e-05	1.65078	0.000281	1.58914	4.69e-06	0.777
212741_at	MAOA	5.35e-12	-1.91432	6.07e-14	-1.51468	1.31e-19	-3.46251	1.46e-05	-2.55091	0.000165	-1.67469	2.82e-09	-0.847
219778_at	ZFPM2	3.19e-07	-3.00137	4.63e-09	-2.75905	1.85e-11	-5.38007	4.69e-07	-3.29198	0.0273	-2.21625	9.97e-07	-1.14
217551_at	OR7E14P	2.82e-05	1.23304	0.0199	0.442541	6.71e-05	1.38357	0.00875	0.917094	0.0126	1.39381	0.000363	0.46
204733_at	KLK6	3.31e-08	2.80938	2.69e-08	2.56093	8.09e-07	3.1305	0.000289	2.33704	0.000124	3.39529	3.09e-05	0.953
203685_at	BCL2	1.66e-05	-1.65703	7.73e-15	-1.9703	7.49e-10	-3.15938	1.06e-05	-3.17991	0.0442	-1.59963	8.43e-06	-0.669
219572_at	CADPS2	1.64e-07	-2.06679	1.41e-22	-1.92927	2.66e-10	-3.08145	0.00452	-1.30464	0.00113	-2.34038	0.00751	-0.357
213429_at	BICC1	0.00231	-1.04206	1.44e-18	-2.1286	1.39e-13	-3.91582	7.4e-06	-2.45041	4.31e-05	-2.36667	0.00329	-0.513
205780_at	BIK	0.0064	0.581113	2.57e-07	1.64019	1.34e-06	1.56224	0.00022	3.21123	0.000159	1.85587	7.6e-07	0.955
218487_at	ALAD	8.53e-06	-1.03586	8.98e-21	-1.13932	1.79e-12	-2.00744	0.00627	-1.1196	0.00665	-1.135	0.0353	-0.342
205303_at	KCNJ8	8.88e-09	-1.5134	2.13e-07	-0.857405	2.66e-13	-2.27312	9.91e-05	-3.45504	0.0041	-1.50214	3.8e-07	-0.464
218974_at	SOBP	8.71e-09	-2.32517	5.47e-12	-2.26683	2.5e-10	-3.64054	0.00303	-1.88792	0.00284	-2.17081	7.58e-06	-0.65
203931_s_at	MRPL12	1.52e-05	0.862414	2.45e-07	1.35134	0.0416	0.649229	0.00103	1.79037	0.0251	0.568036	0.00372	0.393
204464_s_at	EDNRA	0.00205	-1.06295	0.000385	-1.27932	1.54e-05	-3.14189	0.0435	-1.12956	0.0292	-1.39124	3.45e-07	-0.992
204793_at	GPRASP1	6.32e-20	-2.67994	1.56e-14	-2.31537	7.87e-24	-4.30981	2.18e-06	-2.43547	9.03e-07	-2.78233	2.9e-09	-1.1
222281_s_at	LOC101929219///LOC100505650///C1orf186	1.09e-15	3.9232	1.99e-12	3.88071	3.69e-10	4.95936	6.05e-05	4.67	3.92e-06	4.17773	1.45e-07	1.5
207016_s_at	LOC101928635///ALDH1A2	2.01e-16	-4.54668	1.02e-32	-4.36511	5.82e-18	-6.51217	1.15e-14	-8.17545	4.76e-08	-5.27843	0.00196	-0.627
41037_at	TEAD4	0.000562	1.04956	0.000161	0.704719	0.0391	0.594163	0.0112	1.8793	0.00169	1.61441	0.0153	0.324
203323_at	CAV2	7.54e-07	-1.83617	1.13e-14	-2.21358	5.72e-08	-3.8048	1.14e-07	-4.00902	0.00781	-1.81756	0.00111	-0.53
216379_x_at	CD24	9.17e-14	3.23773	3.06e-20	4.34556	3.71e-11	4.70101	9.7e-05	4.20212	8.2e-06	3.57645	7.91e-20	1.88
213375_s_at	N4BP2L1	5.03e-06	-1.26707	2.85e-15	-1.62195	6.31e-08	-2.25757	2.23e-05	-2.28887	0.0165	-1.03326	8.46e-05	-0.484
203911_at	RAP1GAP	1.41e-07	1.25425	0.000297	0.893942	0.00013	1.09462	0.000346	1.54829	0.00333	1.15752	0.000417	0.491
206858_s_at	HOXC6	0.0002	-1.27891	5.97e-19	-2.64051	1.27e-14	-5.01274	0.000186	-2.18216	0.00014	-3.42644	0.024	-0.393
204825_at	MELK	1.16e-09	2.5769	0.000138	0.977121	7.58e-05	2.06158	4.42e-06	3.30682	1.45e-09	3.82301	7.17e-05	0.695
212256_at	GALNT10	0.000757	-0.778161	0.0236	-0.646708	4.81e-06	-1.87016	0.0012	-1.18961	0.0276	-0.949286	2.18e-07	-0.93
220432_s_at	CYP39A1	1.89e-10	-2.53175	3.47e-40	-1.95435	2.28e-15	-4.18276	1.19e-07	-2.53832	0.00222	-2.06054	7.5e-05	-0.524
209552_at	PAX8	3.7e-09	1.81677	2.55e-11	2.12191	5.42e-13	2.50214	9.19e-07	3.97836	2.82e-07	2.86239	6.88e-13	1.7
213647_at	DNA2	1.36e-10	1.82739	1.71e-05	0.603091	0.00036	1.3113	0.000345	2.10901	6.45e-06	2.41954	0.0108	0.304
221234_s_at	BACH2	0.00197	-1.04014	8.38e-13	-0.854008	6.1e-12	-1.88226	0.0135	-1.26717	0.00518	-1.88185	4.2e-07	-0.468
219263_at	RNF128	1.69e-09	-4.00396	1.13e-34	-1.71836	2.7e-15	-4.53014	1.03e-05	-3.68337	0.000327	-3.43453	0.00995	-0.277
201897_s_at	CKS1B	8.2e-05	1.50351	3.22e-05	1.55645	0.024	0.904415	0.0019	1.57181	2.75e-07	2.56461	0.0209	0.364
212609_s_at	AKT3	5.15e-09	-1.60775	2.26e-22	-1.77053	1.01e-11	-3.24187	0.00143	-1.82518	1.13e-05	-1.91023	4.46e-06	-0.902
204755_x_at	HLF	1.45e-14	-3.5082	1e-13	-1.28006	4.35e-12	-2.18777	1.82e-05	-2.97003	1.72e-08	-3.53873	2.01e-13	-1.27
203373_at	SOCS2	3.98e-07	-1.39963	0.000886	-0.66666	7.46e-08	-1.74265	0.0039	-1.38983	0.012	-1.34379	7.64e-08	-0.409
216470_x_at	PRSS2	7.5e-08	3.11872	4.61e-06	1.15109	0.00195	1.30621	0.000821	2.3384	0.000151	3.79639	1.96e-05	0.619
206363_at	MAF	0.000346	-1.07848	7.83e-28	-1.97523	3.75e-19	-3.67832	6.32e-06	-2.51105	0.00126	-2.1153	4.22e-07	-0.802
209699_x_at	LOC101930400///AKR1C2	2.26e-09	-2.34285	0.000126	-0.798914	8.32e-09	-2.20106	1.28e-05	-3.17643	0.0496	-1.12336	0.00382	-0.557
266_s_at	CD24	1.11e-14	3.87615	7.41e-15	3.41202	1.38e-11	4.99022	3.92e-05	4.04859	1.72e-08	5.17578	9.47e-16	1.67
203213_at	CDK1	6.83e-09	2.77124	4.52e-05	1.4803	0.000235	2.68624	4.71e-05	2.4713	1.39e-08	4.41468	0.000135	0.581
213100_at	UNC5B	3.77e-06	1.37847	2.32e-06	0.735879	0.0184	0.623505	0.000985	1.84633	0.0152	1.21436	0.00844	0.338
206834_at	HBD	7.63e-11	-2.94786	1.98e-15	-1.30349	2.2e-09	-3.14567	0.0195	-1.75147	3.07e-06	-4.2208	0.0107	-0.213
212807_s_at	SORT1	3.6e-09	2.0706	3.89e-11	1.72726	1.79e-08	1.98186	2.01e-07	3.22043	4.19e-05	2.74927	1.18e-05	0.543
216620_s_at	ARHGEF10	1.7e-08	-1.56157	1.45e-16	-1.5519	3.98e-16	-2.93924	8.35e-05	-1.84148	0.0369	-1.42606	0.0382	-0.367
208131_s_at	PTGIS	3.91e-13	-3.50831	6.3e-09	-2.60326	8.79e-20	-5.54505	0.000871	-3.17578	0.000171	-3.75983	0.00104	-0.766
204653_at	TFAP2A	4.75e-05	2.08848	0.00358	1.08276	0.000156	2.60044	5.7e-06	4.38912	0.0235	2.21102	0.00208	0.68
201278_at	LOC101926921///DAB2	1.77e-14	-2.87347	5.57e-28	-2.89922	7.48e-18	-5.05318	1.18e-08	-3.13168	8.3e-07	-3.24444	0.00117	-0.398
204510_at	CDC7	0.000262	1.37373	0.00446	0.698871	0.0196	1.18505	6.55e-05	1.68046	1.23e-05	2.66493	0.011	0.309
203139_at	DAPK1	0.0218	-0.695025	1.62e-21	-2.24884	8.8e-20	-4.62329	1.39e-06	-2.06064	6.66e-05	-2.30964	0.000113	-0.524
201664_at	SMC4	2.51e-05	1.53181	0.002	1.20325	0.0318	0.715766	0.00545	1.35126	2.36e-06	2.65021	8.58e-05	0.444
213370_s_at	SFMBT1	1.43e-05	1.40145	0.00678	0.434992	7.94e-06	1.08243	2.07e-05	1.79569	0.000171	1.98604	0.000887	0.286
209199_s_at	MEF2C	2.89e-05	-1.28728	6.36e-07	-1.0629	5.69e-09	-2.46655	0.000218	-1.19891	0.00719	-1.28326	1.01e-07	-0.559
202580_x_at	FOXM1	3.08e-13	3.26423	9.97e-10	1.68586	4.27e-06	2.00505	5.65e-06	3.14461	9.92e-05	1.97797	0.000961	0.99
218346_s_at	SESN1	1.57e-05	-0.851327	0.000651	-0.705895	3.95e-10	-1.59895	8.12e-05	-2.33812	0.0082	-0.835511	3.31e-08	-0.717
219306_at	KIF15	9.07e-09	2.00317	2.23e-05	0.947983	6.46e-05	1.98189	0.000391	1.9845	4.24e-06	2.19035	0.00567	0.392
203887_s_at	THBD	1.44e-15	-2.65194	7.46e-12	-1.67881	3.19e-15	-3.74397	0.00446	-2.19904	3.34e-07	-1.95611	0.0378	-0.328
202968_s_at	DYRK2	1.09e-05	1.14383	0.000948	0.591292	0.00152	0.871681	1.6e-05	1.85724	9.7e-06	1.64499	4.36e-06	0.431
202005_at	ST14	9.18e-07	1.37236	4.74e-08	1.18392	0.013	0.732193	0.00844	1.12674	4.08e-05	2.11787	3.56e-13	1.48
215506_s_at	DIRAS3	5.47e-21	-4.08926	7.7e-16	-2.77867	1.18e-20	-4.59651	0.00401	-1.92804	9.86e-10	-4.1554	2.57e-10	-1.02
207316_at	HAS1	1.72e-26	-3.79688	3.81e-15	-2.02722	5.24e-15	-2.93398	0.0336	-1.68065	6.1e-12	-4.86084	2.4e-06	-0.431
212242_at	TUBA4A	0.000794	1.24968	6.39e-06	1.50563	0.00165	1.43067	0.000478	1.28242	2.37e-05	2.23748	0.00132	0.369
220180_at	CCDC68	1.22e-05	-1.48714	3.49e-11	-0.742874	3.66e-11	-2.09293	0.000288	-2.26682	1.97e-08	-2.6833	4.59e-07	-0.795
210481_s_at	CLEC4M	6.03e-19	-3.24492	3.52e-46	-2.46988	1.03e-16	-3.88065	0.000244	-2.80074	1.12e-07	-5.38449	0.000137	-0.647
209692_at	EYA2	9.74e-09	3.16347	0.0184	0.971532	0.0319	1.44439	0.00312	1.92918	0.00789	2.34939	0.00125	1.06
204072_s_at	FRY	1.29e-07	-2.56318	6.93e-34	-3.10251	3.74e-16	-4.85805	1.03e-08	-3.13971	0.0152	-2.39125	0.00176	-0.34
208933_s_at	LGALS8	7.75e-11	-2.56705	4.13e-36	-3.35962	2.61e-12	-4.60677	5.96e-08	-2.64863	0.00154	-2.2807	0.0188	-0.408
218449_at	UFSP2	3.05e-10	-2.16996	3.47e-24	-2.37212	1.01e-14	-3.36686	2.51e-06	-1.91811	0.0279	-1.19668	3.97e-08	-0.577
204584_at	L1CAM	0.00134	1.21992	1.34e-05	1.21697	0.000858	1.81969	1.37e-05	3.37838	0.0199	2.0211	0.02	0.692
207904_s_at	LNPEP	3.4e-05	0.65354	0.000136	0.339946	0.00502	0.509676	0.0075	1.33644	0.00023	0.87714	0.029	0.219
214683_s_at	CLK1	5.06e-06	-0.884038	3.62e-20	-2.18401	7.36e-11	-3.01145	0.000128	-2.81118	0.038	-0.962633	5.53e-05	-0.417
208869_s_at	GABARAPL1	0.000466	-1.30106	9.97e-10	-1.22354	1.18e-07	-2.09578	0.00203	-1.4422	0.0471	-1.12758	5.13e-05	-0.464
219993_at	SOX17	2.1e-16	4.54407	1.06e-15	3.07392	1.41e-09	3.63815	6.34e-07	3.54198	2.55e-06	4.16738	1.22e-12	1.16
203214_x_at	CDK1	3.84e-05	1.39778	2.86e-06	1.36608	0.000579	1.80315	0.000437	2.00482	0.000775	2.08112	0.00366	0.422
219648_at	MREG	5.2e-05	1.55017	0.0176	0.689158	0.0081	1.11971	0.000874	1.27009	1.31e-05	2.75532	0.00117	0.496
212224_at	ALDH1A1	2.98e-11	-2.92723	2.09e-12	-2.77912	1.9e-19	-5.25544	0.000108	-2.2118	5.15e-05	-3.53678	4.81e-10	-1.35
205428_s_at	CALB2	6.32e-16	-2.68532	9.23e-39	-3.89844	3.96e-23	-4.49653	0.000668	-2.86129	3.15e-10	-4.70497	0.000908	-0.449
214044_at	RYR2	2.62e-14	-2.53712	7.11e-25	-1.26726	5.99e-13	-2.69725	0.000309	-3.18748	3.68e-08	-2.75442	0.000207	-0.371
202870_s_at	CDC20	8.6e-09	2.62935	9.16e-08	2.06889	0.0136	1.19717	4.66e-06	2.44005	8.84e-08	3.76429	0.00819	0.67
218066_at	SLC12A7	1.18e-07	1.17933	0.00107	0.505145	0.0208	0.540734	0.000322	1.30063	0.000212	1.67791	3.9e-07	0.486
209464_at	AURKB	5.71e-07	2.35421	6.43e-05	0.693499	0.00664	0.720885	0.00409	1.61588	0.00162	0.946096	0.0261	0.319
211527_x_at	VEGFA	0.000136	0.879472	1.58e-06	1.10371	0.00103	0.765519	9.66e-06	3.48491	0.0161	0.952349	0.0205	0.608
218421_at	CERK	4.44e-06	-1.05622	9.48e-09	-1.1656	3.83e-09	-2.41468	0.042	-0.685809	0.0138	-1.17351	0.00225	-0.298
202338_at	TK1	3.61e-07	1.82817	1.8e-07	1.03966	9.52e-05	1.61683	1.27e-05	2.77208	8.03e-07	2.6583	4.69e-07	0.802
204466_s_at	SNCA	1.64e-14	-1.79831	3.29e-18	-1.83376	1.58e-17	-4.0213	2.41e-05	-4.20197	0.000972	-1.46707	2.67e-07	-0.725
206262_at	ADH1C	1.15e-16	-3.13962	4.04e-34	-1.42593	6.88e-18	-3.85409	3.18e-07	-3.90825	3.1e-10	-3.75577	0.0397	-0.244
207628_s_at	WBSCR22	1.98e-07	1.08304	9.2e-07	1.25034	0.000118	1.09743	0.0277	0.676021	4.38e-05	1.62879	0.00309	0.315
218741_at	CENPM	2.59e-09	1.95188	7.85e-09	0.998109	0.00217	0.958878	0.00325	2.5605	3.86e-06	3.04371	0.000931	0.652
205908_s_at	OMD	0.00474	-0.982006	2e-07	-0.896425	7.03e-10	-2.17898	0.000537	-3.14452	5e-05	-1.90141	4.03e-08	-0.843
219497_s_at	BCL11A	4.45e-07	1.73857	3.3e-09	1.35744	3.49e-05	1.84919	0.000112	3.41929	0.00717	1.90691	0.00696	0.569
210788_s_at	DHRS7	0.000596	-1.22739	4.93e-10	-1.51363	3.24e-10	-2.48824	1.78e-05	-2.87311	0.0276	-1.02255	0.000589	-0.448
204437_s_at	FOLR1	7.57e-12	3.55397	1.83e-11	3.4742	2.98e-08	4.65118	9.85e-06	3.71576	0.000388	3.7229	8.99e-08	1.67
208952_s_at	LARP4B	5.78e-13	1.21697	2.03e-07	0.877968	0.000265	0.837642	0.000567	1.39813	0.000112	1.34051	6.85e-07	0.478
209469_at	GPM6A	1.7e-09	-4.08675	2.01e-62	-3.85864	7.72e-13	-5.52654	2.18e-06	-4.3223	2.43e-05	-4.06752	3.73e-05	-0.674
210397_at	DEFB1	0.000118	2.29547	0.000153	2.54129	0.00223	2.65857	0.000283	3.51549	0.00714	2.97854	0.00778	0.834
218412_s_at	GTF2IRD1	0.000853	1.10853	1.93e-07	0.818817	0.0267	0.51903	0.00032	1.36809	0.000211	2.14439	0.000111	0.408
203362_s_at	MAD2L1	2.06e-06	1.7272	0.00133	1.22321	0.00117	2.0263	0.0203	1.35688	2.66e-07	2.5193	0.00205	0.49
204768_s_at	FEN1	1.45e-05	1.22032	1.39e-05	0.691536	4.56e-06	1.10736	0.000821	1.87028	2.97e-05	1.47083	0.0297	0.262
204146_at	RAD51AP1	1.49e-07	2.06905	0.0167	0.785902	7.11e-05	2.47377	0.000127	2.36269	1.11e-05	2.91895	0.00982	0.461
203695_s_at	DFNA5	5.9e-17	-3.25508	3.11e-43	-3.34069	2.5e-19	-5.47365	9.4e-09	-3.44269	6.33e-06	-3.35744	0.000145	-0.544
218944_at	PYCRL	9.74e-07	0.920388	5.31e-07	1.12496	0.0222	0.553902	0.00754	1.91383	0.000343	1.41988	0.0495	0.291
209621_s_at	PDLIM3	0.00521	-0.968398	0.0183	-0.885832	1.66e-10	-2.79269	2.18e-07	-3.6319	0.00899	-1.31109	0.000136	-0.612
205282_at	LRP8	7.71e-08	2.11208	0.0149	0.303561	0.000964	0.901361	6.76e-05	2.20054	0.0449	0.874765	0.0388	0.216
205517_at	GATA4	1.03e-15	-2.46057	3.98e-09	-1.2368	1.78e-14	-3.2988	0.0165	-1.66445	4.77e-05	-1.24715	3.97e-08	-1.06
202992_at	C7	7.11e-05	-2.87781	0.0221	-1.25667	4e-07	-4.15586	0.046	-2.04066	0.0126	-3.39491	1.9e-05	-1.48
209447_at	SYNE1	4.42e-10	-1.98701	6.38e-09	-1.33376	4.15e-14	-2.90026	5.26e-07	-2.66458	0.00111	-1.94099	6.04e-06	-0.851
201287_s_at	SDC1	1.66e-06	1.13638	6.61e-08	1.28613	5.74e-08	1.81293	0.0222	1.50825	0.0086	1.01774	0.000665	0.543
202936_s_at	SOX9	2.69e-09	2.56615	5.41e-12	2.21883	0.000473	1.89396	0.000813	1.8744	8.34e-08	3.83021	1.4e-06	0.977
219787_s_at	ECT2	1.6e-08	2.28607	0.000727	1.33977	0.000931	2.2684	0.000101	2.23879	9.66e-08	3.59204	8.72e-08	0.79
203058_s_at	PAPSS2	1.25e-05	-1.35977	4.75e-19	-1.68028	7.01e-14	-3.7144	0.00013	-2.50004	5.59e-07	-2.69946	0.00414	-0.45
217499_x_at	OR7E37P	2.89e-06	1.15792	5.4e-06	0.962993	0.00174	0.841495	1.46e-05	2.34509	5.89e-05	2.11501	0.0182	0.325
213421_x_at	PRSS3	0.000283	0.425578	1.28e-07	0.651053	2.94e-08	0.965152	0.0339	1.11981	0.0152	0.574488	0.00281	0.381
219890_at	CLEC5A	0.0108	0.51518	0.000805	0.496028	0.0121	0.511071	0.00387	2.25161	0.028	0.717938	3.89e-05	0.409
203543_s_at	KLF9	7.19e-09	-2.15264	3.94e-08	-0.950508	8.24e-10	-3.02214	8.62e-05	-2.43188	0.0183	-1.46546	0.00349	-0.401
202790_at	CLDN7	1.11e-07	1.54825	8.79e-10	1.81332	7.34e-06	1.23535	0.00215	2.16092	3.82e-05	1.29506	4.01e-13	1.13
204218_at	ANAPC15	0.00118	0.822696	4.78e-06	0.888016	0.0199	0.516872	0.0118	1.42594	0.00371	1.47806	0.00264	0.254
205498_at	GHR	6.83e-12	-3.53074	7.36e-18	-2.52147	2.32e-23	-5.13239	5.53e-08	-3.35685	0.00472	-2.93278	0.00232	-0.528
211470_s_at	SULT1C2	2.26e-09	2.90383	3.57e-05	1.01474	0.00063	2.46084	1.62e-05	4.5876	0.0265	2.07724	0.0496	0.427
219493_at	SHCBP1	5.43e-05	1.33534	0.00329	0.364336	0.00708	1.11933	0.0254	1.22272	0.000531	2.03947	0.0302	0.217
201563_at	SORD	2.23e-11	2.01007	4.52e-06	1.38323	0.00118	1.11802	2.54e-06	2.04529	9.74e-06	2.3342	0.000398	0.384
205803_s_at	TRPC1	4.31e-08	-2.18759	1.24e-28	-2.47603	4.89e-10	-3.5647	0.000115	-2.60498	0.0169	-1.70001	5.1e-06	-0.624
209262_s_at	NR2F6	9.85e-08	2.14743	1.56e-07	1.4779	0.000376	1.12468	1.63e-07	3.02983	1.32e-08	3.50065	5.6e-06	0.687
204749_at	NAP1L3	2.77e-09	-3.0133	1.43e-30	-3.28136	2.13e-11	-4.73184	1.61e-05	-2.68016	0.00034	-3.03725	3.54e-05	-0.71
221207_s_at	NBEA	1.12e-07	-2.31378	4.56e-35	-1.79717	2.53e-12	-3.51905	3.16e-07	-3.50072	0.00313	-1.88821	0.000219	-0.4
219768_at	VTCN1	1.36e-06	1.87505	0.000345	1.51886	0.000549	2.80432	0.0149	1.81666	0.00389	2.94961	0.00104	1.09
205437_at	ZNF211	0.00202	-0.617982	2.66e-11	-0.932846	4.97e-14	-1.7911	0.00337	-1.41093	0.00413	-0.802547	0.000111	-0.408
203065_s_at	CAV1	4.62e-09	-2.77965	1.23e-07	-1.77354	9.94e-15	-4.21081	1.9e-07	-2.43813	0.00497	-2.68457	1.97e-05	-0.747
220892_s_at	PSAT1	4.96e-06	0.952907	6.26e-05	1.28313	3.75e-07	1.3908	0.0017	1.87642	0.0387	0.661055	0.019	0.571
202156_s_at	CELF2	2.7e-10	-2.49435	1.76e-23	-2.1972	7.2e-13	-3.00585	7.9e-05	-2.05306	0.000288	-2.39918	7.64e-08	-0.762
219049_at	CSGALNACT1	9.06e-16	-3.42722	8.42e-17	-2.31946	2.78e-14	-4.56416	7.32e-08	-3.87983	9.2e-06	-1.34749	5.31e-10	-1.03
90265_at	ADAP1	0.000214	0.572929	1.99e-12	1.04988	0.00588	0.57628	0.0332	1.16165	0.0159	0.568815	0.00163	0.377
201710_at	MYBL2	0.00287	0.920094	1.06e-09	0.984245	0.00028	1.00043	0.00844	1.53416	0.0442	0.840239	0.0091	0.387
213364_s_at	SNX1	1.07e-06	-1.39842	3.12e-27	-1.9559	1.79e-12	-3.15012	6.03e-06	-3.18512	0.0244	-1.22719	0.00356	-0.555
218613_at	PSD3	0.00311	-0.61869	6.93e-33	-2.2679	7.48e-09	-2.85493	1.03e-05	-3.11616	0.000261	-1.65204	1.9e-08	-0.73
212427_at	KIAA0368	2.15e-10	-1.07146	6.28e-15	-0.978744	3.83e-07	-1.97043	0.0202	-0.942801	0.00328	-1.0553	0.000135	-0.428
203764_at	DLGAP5	1.39e-11	3.00773	1.63e-05	1.39206	4.48e-06	3.15185	0.000608	2.69873	1.06e-08	3.71261	0.000754	0.553
213238_at	ATP10D	8.78e-11	-2.19565	3.75e-38	-2.27162	1.1e-13	-3.54483	3.53e-06	-1.91972	3.75e-05	-1.92026	1.05e-05	-0.551
213139_at	SNAI2	3.64e-05	-1.3366	7.42e-05	-1.33294	1.47e-07	-3.3294	0.000106	-2.27119	0.00513	-1.55629	0.000594	-0.717
201286_at	SDC1	1.4e-05	1.96586	2.55e-06	1.27569	0.00243	1.41749	0.012	2.09364	0.00199	2.55595	0.0186	0.526
204641_at	NEK2	4.19e-14	3.31922	3.62e-09	1.87046	1.15e-10	3.45431	1.17e-08	3.36685	7.74e-09	3.34426	2.27e-05	0.79
204259_at	MMP7	1.07e-08	3.80987	0.000357	2.15936	0.000124	3.62935	0.000231	3.27544	0.000112	4.40733	0.00478	0.968
207995_s_at	CLEC4M	3.06e-19	-3.7084	5.18e-45	-2.51265	8.56e-13	-3.9006	1.82e-05	-3.28422	9.08e-08	-4.14151	2.22e-05	-0.416
210946_at	PLPP1	2.57e-08	-1.01731	2.25e-24	-2.90344	4.05e-16	-3.99183	1e-06	-2.57444	2.84e-06	-1.99668	0.0249	-0.21
204836_at	GLDC	1.27e-06	2.59827	1.14e-05	1.86391	9.3e-05	2.56633	1.9e-07	4.20037	0.00855	2.6923	0.00316	0.853
205979_at	SCGB2A1	3.52e-11	4.60354	1.76e-06	3.59182	2.16e-06	4.39966	0.0029	3.76675	9.4e-05	4.75346	5.31e-07	1.64
203954_x_at	CLDN3	6.32e-15	3.66536	1.12e-15	2.76085	5.14e-11	3.07399	0.000244	2.60387	1.25e-05	3.44762	1.16e-11	1.74
204328_at	TMC6	2.52e-06	0.977136	6.05e-06	0.778467	0.000514	0.791485	1.78e-05	1.90529	0.000398	1.18323	3.72e-05	0.498
205141_at	ANG	1.12e-09	-1.77542	3.19e-06	-0.755193	1.42e-10	-2.074	0.0121	-1.36633	0.000232	-1.55123	1.29e-06	-0.924
219388_at	GRHL2	7.32e-15	2.09669	1.61e-08	1.03742	7.41e-11	1.73979	0.000168	2.12979	1.26e-06	2.09696	1.57e-06	0.725
209714_s_at	CDKN3	6.29e-06	1.73342	1.2e-06	1.4819	0.000179	1.76306	0.000109	1.89709	6.24e-05	2.10671	0.00768	0.422
209408_at	KIF2C	0.000646	1.29084	1.47e-08	1.2994	1.12e-09	2.67761	8.02e-08	2.99305	3.01e-09	3.60779	0.000148	0.517
213669_at	FCHO1	0.0342	0.396915	0.000134	0.694458	0.0175	0.344844	0.0464	1.0047	0.0374	0.685354	0.000133	0.333
32837_at	AGPAT2	2.85e-06	1.28589	1.26e-13	1.2333	0.00895	0.39401	0.00237	1.50081	0.0373	0.511372	0.00922	0.3
221933_at	NLGN4X	1.17e-10	-2.01232	5.49e-10	-1.55071	3.23e-08	-3.79198	0.0051	-2.62764	0.000635	-2.12971	0.00106	-0.751
210652_s_at	TTC39A	3.62e-07	2.1194	0.000647	0.876054	3.71e-06	1.71661	0.000148	2.63768	0.000839	2.43667	3.5e-06	0.801
213992_at	COL4A6	4.22e-05	-1.3273	4.7e-05	-0.930664	3.34e-14	-2.48229	6.49e-05	-1.8268	0.0136	-1.71527	0.00887	-0.272
203744_at	HMGB3	2.86e-10	2.47086	9.72e-06	0.980607	0.00217	1.24314	0.0012	1.44804	3.22e-07	3.01177	0.0031	0.437
205518_s_at	CMAHP	4.51e-16	-2.92224	1.38e-14	-1.62041	4.86e-16	-3.98041	0.00139	-2.52601	4.91e-06	-2.61593	0.0329	-0.199
217672_x_at	EIF1	1.47e-16	-3.02812	0.00581	-0.287314	4.44e-06	-0.686913	0.0405	-0.819099	0.022	-0.821068	0.000128	-0.466
202095_s_at	BIRC5	1.27e-06	1.46118	9.04e-09	1.9508	6.51e-06	1.85342	3.34e-08	3.79282	9.59e-07	2.9141	0.000617	0.71
217232_x_at	HBB	7.24e-22	-4.54177	8.57e-07	-2.96551	1.2e-23	-7.3078	9.03e-08	-5.25004	5.24e-07	-4.5429	2.1e-06	-0.952
210052_s_at	TPX2	0.000647	1.1519	2.22e-12	1.72683	3.67e-08	2.66751	2.02e-08	3.42813	0.00113	1.45578	0.0021	0.671
213800_at	CFH	1.75e-06	-2.54309	4.63e-10	-2.26546	6.37e-09	-4.49255	8.54e-05	-3.21395	0.00134	-2.55235	1.12e-06	-0.918
204211_x_at	EIF2AK2	0.0175	0.389791	0.000379	0.493389	0.00414	0.499763	0.0124	0.888522	0.0119	1.05904	0.00011	0.324
212531_at	LCN2	2.41e-06	2.5509	4.83e-06	2.59795	0.000945	2.66506	0.000498	2.84878	0.00445	2.98393	4.96e-06	1.49
204444_at	KIF11	8.58e-10	2.36612	0.00028	0.811906	0.000112	2.13722	0.00101	2.33343	5.35e-09	3.5418	0.0323	0.361
204942_s_at	ALDH3B2	1.09e-06	2.16425	0.00124	0.78834	0.00202	1.49591	0.0127	1.99586	0.00219	2.76978	0.00395	0.504
219172_at	UBTD1	0.00817	0.481925	8.96e-10	0.739314	0.00446	0.362497	0.0125	1.39784	0.00209	0.824888	0.031	0.171
205034_at	CCNE2	1.34e-06	1.7614	0.0143	0.582478	0.00035	1.77268	0.000828	1.73755	9.63e-06	2.58874	0.0114	0.377
218693_at	TSPAN15	2.43e-06	0.877475	2.42e-15	0.922895	0.00632	0.84263	0.000195	2.29284	0.00315	0.991646	1.21e-07	0.592
219359_at	PGGHG	2.97e-05	1.07374	0.000953	1.39996	0.0107	1.18591	4.27e-05	2.52496	0.0413	0.846228	0.00575	0.606
218280_x_at	HIST2H2AA4///HIST2H2AA3	4.36e-05	1.68951	3.36e-05	1.68941	0.0035	1.29825	8.27e-05	2.09013	0.00147	2.30279	0.0175	0.517
32137_at	JAG2	3.23e-07	1.10365	2.85e-08	1.05223	2.75e-07	1.27165	0.000861	1.45259	0.0125	0.864634	0.000754	0.409
203881_s_at	DMD	1.77e-05	-2.05947	2.03e-17	-2.62651	1.33e-09	-4.28014	2.55e-06	-2.40076	0.0334	-1.79237	7.96e-05	-0.634
213397_x_at	RNASE4	2.86e-08	-2.71081	5.32e-16	-2.92585	1.42e-11	-4.63038	4.05e-07	-4.28357	0.00214	-2.72059	3.9e-11	-0.998
204558_at	RAD54L	2.03e-06	0.821359	2.05e-06	0.687201	5.62e-12	1.65882	0.000156	3.33443	0.000232	0.832207	4.5e-05	0.302
206101_at	ECM2	1.07e-08	-2.79433	7.51e-18	-2.56347	1.62e-11	-5.05727	7.93e-05	-2.59103	0.000144	-3.10396	1.7e-13	-1.02
213249_at	FBXL7	4.94e-09	-1.5425	8.18e-09	-1.0624	1.07e-08	-2.23413	0.0296	-0.787786	0.0115	-0.922354	1.53e-05	-0.53
218900_at	CNNM4	8.6e-06	0.82921	5.46e-05	0.381003	0.00437	0.535511	0.00411	1.51534	0.000494	1.20044	2.8e-05	0.412
209116_x_at	HBB	2.38e-21	-5.12206	4.03e-08	-4.09804	4.38e-21	-8.9728	4.47e-08	-6.75948	3.21e-08	-5.68714	1.83e-06	-1.06
218567_x_at	DPP3	8.46e-07	1.14873	0.00107	0.631517	0.00118	0.653628	5.31e-05	1.73861	2.3e-06	1.69585	5.21e-05	0.65
203780_at	MPZL2	1.43e-12	2.71306	6.87e-05	1.14022	3.57e-06	2.9127	0.00516	1.84832	1.12e-06	3.43777	0.000118	0.794
208650_s_at	CD24	2.83e-17	5.89417	7.43e-14	3.99599	4.8e-11	5.86236	5.69e-06	5.89431	3.52e-08	7.41552	1.68e-11	1.65
203358_s_at	EZH2	5.98e-10	1.69677	0.00913	0.637662	0.000128	1.69771	5.69e-06	2.43039	1.04e-05	2.13777	0.00531	0.419
206364_at	KIF14	2.53e-08	2.03595	1.13e-08	0.822107	0.0126	0.617384	0.000282	1.90223	1.29e-07	3.0822	6.63e-05	0.536
208149_x_at	DDX11	0.00322	0.621289	1.6e-06	0.835195	2.91e-05	0.608871	0.00128	1.34608	0.0077	0.746049	0.000721	0.366
221990_at	PAX8	1.53e-10	1.45803	5.54e-07	0.86944	3.74e-08	1.35151	0.00185	2.309	0.00116	1.34999	7.49e-05	0.34
212479_s_at	RMND5A	0.00154	0.864834	0.0127	0.51925	0.00138	1.00182	0.0119	1.13509	0.000151	1.35417	0.00943	0.34
216333_x_at	TNXB///TNXA	1.16e-09	-1.45407	1.06e-05	-1.68082	2.86e-22	-3.35331	0.0415	-1.46511	1.73e-07	-2.82668	3.45e-11	-0.848
213515_x_at	HBG2///HBG1	5.22e-15	-3.60472	8.43e-20	-2.45235	4.75e-13	-4.88748	4.3e-06	-4.50958	7.53e-06	-3.64614	8.89e-06	-0.557
202159_at	FARSA	0.000513	0.934018	4.42e-07	0.860233	0.03	0.502765	0.000587	1.65868	0.00101	1.41571	0.0389	0.208
209772_s_at	CD24	1.33e-11	3.6931	1.45e-06	1.6314	4.88e-08	2.86875	2.8e-06	3.85345	0.000268	3.49009	3.66e-09	1.49
203758_at	CTSO	5.68e-05	-0.94419	1.94e-06	-1.13487	8.97e-09	-2.29051	2.91e-05	-1.59851	0.00623	-1.15397	0.0057	-0.272
208159_x_at	DDX11	0.00192	0.650235	7.55e-06	0.712114	0.000109	0.669686	1.78e-05	1.62783	0.0165	0.880606	0.00189	0.318
201067_at	PSMC2	0.00742	-0.418734	5.35e-16	-1.22627	2.99e-09	-1.51672	0.00224	-1.34324	0.00935	-0.841959	6.4e-06	-0.463
202731_at	MIR4680///PDCD4	0.00012	-1.22515	0.0227	-0.675229	4.06e-06	-2.24475	0.0114	-0.905884	0.0377	-1.07983	4.51e-07	-0.604
213309_at	PLCL2	8.16e-06	-0.770089	1.25e-24	-1.82681	2.22e-12	-3.35317	1.05e-06	-2.79311	0.00354	-1.72206	1.31e-07	-1.16
204267_x_at	PKMYT1	0.000254	0.910846	1.59e-06	0.548836	5.04e-07	0.756348	0.00281	2.22356	2.14e-05	0.973597	0.000111	0.334
205934_at	PLCL1	8.63e-10	-1.49231	0.00453	-0.373796	2.82e-08	-1.54472	0.016	-1.50991	0.0156	-1.31287	2.16e-09	-0.564
201037_at	PFKP	2.75e-07	2.05606	1.43e-06	1.59709	2.99e-05	1.80791	1.3e-05	1.83045	3.35e-06	3.33251	0.00189	0.49
212243_at	GCOM1///POLR2M	4.61e-06	-1.08449	4.45e-28	-1.24331	1.16e-09	-2.15761	8.59e-05	-1.57474	0.0163	-0.871604	7.47e-05	-0.354
215058_at	DENND5B	1.05e-12	-3.00474	0.000186	-0.21617	1.45e-09	-1.81839	0.0177	-1.19565	0.0101	-1.6064	0.0123	-0.361
209242_at	PEG3	4.83e-05	-2.93591	1.54e-06	-3.1553	1.23e-07	-4.75315	0.00999	-2.83441	0.0148	-3.10431	2.33e-09	-1.4
202724_s_at	FOXO1	0.00145	-0.922849	6.57e-07	-1.10836	1.09e-06	-1.83351	2.68e-05	-1.61247	0.00844	-0.82119	7.41e-08	-0.642
211896_s_at	DCN	8.3e-08	-3.12576	0.0139	-1.64533	2.34e-09	-5.80215	1.88e-07	-4.76771	0.00521	-3.34259	7.91e-05	-0.99
201839_s_at	EPCAM	5.31e-10	2.60766	5.2e-05	1.93741	1.68e-07	2.55636	4.27e-05	2.72392	3.15e-10	3.71753	6.96e-15	1.52
209470_s_at	GPM6A	5.63e-10	-3.67054	5.13e-26	-1.82521	4.07e-12	-4.29267	0.00462	-2.16283	1.26e-05	-2.10085	0.000192	-0.492
213156_at	ZBTB20	7.99e-07	-1.60232	2.99e-15	-2.27837	1.12e-07	-3.06024	0.00097	-1.93656	0.00984	-1.36686	7.31e-06	-0.743
204826_at	CCNF	0.00031	0.62301	0.00761	0.373744	0.00347	0.601039	0.00391	1.24822	0.00668	0.766005	0.0465	0.255
203603_s_at	ZEB2	7.63e-06	-1.88215	2.3e-05	-0.732661	6.13e-07	-2.57942	0.015	-1.07537	0.00245	-1.8226	0.000218	-0.357
219295_s_at	PCOLCE2	6.07e-18	-3.77256	1.16e-22	-2.22582	1.98e-16	-4.99828	0.000772	-2.66848	0.00219	-3.02041	0.00498	-0.291
203755_at	BUB1B	9.84e-10	2.63409	6.89e-07	1.32725	5.15e-05	2.19785	2.03e-07	2.91719	1.06e-08	3.64947	0.000314	0.596
215039_at	LINC01140	0.013	-0.519611	2.13e-07	-0.799063	3.67e-13	-1.59546	0.0108	-1.39259	0.0135	-0.811919	2.59e-05	-0.416
202719_s_at	TES	6.05e-08	1.53527	0.00015	0.848455	1.02e-07	1.47643	0.0332	0.881998	1.04e-05	2.15378	0.015	0.292
210665_at	TFPI	1.31e-09	-1.41247	2.3e-05	-0.323867	1.85e-06	-0.815729	0.00655	-1.67561	0.000142	-1.43104	5.35e-05	-0.362
204388_s_at	MAOA	0.0306	-0.525274	4.89e-21	-0.869595	3.21e-10	-2.30711	0.00143	-2.46003	0.00996	-1.07006	8.57e-06	-0.63
823_at	CX3CL1	2.77e-06	1.68853	7.99e-06	0.896979	0.000118	1.63683	4.4e-05	2.1256	0.00333	1.58325	0.0337	0.266
219148_at	PBK	6.03e-07	2.38511	0.000387	1.37355	0.00386	1.6514	0.00154	1.8932	4.57e-07	4.06509	0.00142	0.517
203904_x_at	CD82	1.99e-05	1.20715	2.22e-08	0.798464	2.67e-05	1.0765	1.97e-05	2.30706	0.00138	1.67192	0.0161	0.382
203688_at	PKD2	1.09e-17	-3.91682	1.14e-15	-2.20413	7.19e-18	-4.61167	7.59e-07	-2.25741	0.00068	-2.00133	2.47e-05	-0.453
213587_s_at	ATP6V0E2	9.75e-07	1.40872	0.000774	0.88194	0.00243	1.10748	0.00508	1.09914	0.00031	1.83995	2.46e-06	0.598
203178_at	GATM	2.66e-05	-2.19709	9.87e-08	-1.29299	2.65e-07	-3.36669	0.00271	-1.64186	0.00866	-1.97487	1.43e-06	-0.855
221841_s_at	KLF4	4.94e-09	-2.15981	7.46e-06	-2.22342	3.89e-09	-4.12686	8.35e-05	-2.32924	0.0022	-1.80472	1.72e-05	-0.914
213693_s_at	MUC1	1.54e-09	2.41826	8.79e-10	2.91037	4.91e-07	3.03698	1.54e-08	4.8718	1.99e-05	2.98495	1.32e-20	2.35
219330_at	VANGL1	4.53e-09	1.10648	0.00135	0.587673	0.00122	0.864043	0.0333	0.851223	7.25e-06	1.63298	0.00561	0.302
205116_at	LAMA2	8.03e-06	-1.19461	0.000585	-0.640757	2.42e-06	-1.4403	0.0117	-1.10004	0.000257	-1.54594	1.14e-11	-0.902
212801_at	MIR1178///CIT	0.000116	0.628053	0.00941	0.40738	1.12e-07	1.20205	0.000502	1.91185	0.00181	0.619994	2.36e-06	0.387
202924_s_at	PLAGL2	0.000423	0.6043	1.57e-05	0.538457	5.66e-10	1.29401	0.00886	1.05673	0.00155	0.873847	0.000725	0.256
205700_at	HSD17B6	1.11e-07	-2.30581	3.7e-13	-1.41116	6.94e-17	-4.62297	0.00328	-1.93789	0.0142	-1.60458	6.46e-05	-0.559
218279_s_at	HIST2H2AA4///HIST2H2AA3	4.55e-09	0.892977	0.00159	0.359377	0.0139	0.476195	0.000205	1.90784	0.00165	0.682005	0.00024	0.323
206542_s_at	SMARCA2	9.17e-05	-1.61172	2.03e-14	-2.07299	8.37e-06	-3.2122	2.07e-06	-3.40229	0.0354	-1.47834	1.79e-06	-0.711
205259_at	NR3C2	5.4e-07	-1.16806	4.52e-13	-1.24	2.06e-11	-2.90442	2.43e-05	-2.78746	0.00419	-1.29715	0.000348	-0.649
203046_s_at	TIMELESS	3.6e-12	2.37435	2.8e-07	1.04031	0.000171	1.53239	0.000175	1.84963	0.000153	1.8608	0.0213	0.315
205402_x_at	PRSS2	5.32e-06	2.08039	0.00279	0.949397	4.29e-05	1.919	4.92e-05	2.81209	0.00359	2.24129	0.0193	0.535
220917_s_at	WDR19	0.0134	-0.463184	2.41e-14	-1.38346	4.92e-08	-2.26803	0.0334	-1.21798	0.013	-0.80109	0.000396	-0.413
204060_s_at	PRKY///PRKX	9.52e-05	1.32296	0.00221	0.853189	0.00967	1.02389	0.00269	1.38799	0.00133	2.2251	0.000708	0.517
214120_at	RFPL1S	3.1e-09	-1.22285	0.0429	-0.205335	2.3e-06	-1.22407	0.00242	-2.08064	0.00288	-1.08885	1.09e-05	-0.572
204848_x_at	HBG2///HBG1	1.73e-11	-2.46479	5.43e-08	-0.931598	1.63e-09	-2.28979	2.03e-06	-3.85604	1.21e-05	-3.24227	0.00369	-0.234
204719_at	ABCA8	2.35e-25	-5.06993	2.22e-19	-4.16775	8.05e-33	-7.79767	1.23e-06	-5.66115	1.8e-09	-5.51377	1.18e-18	-1.66
204260_at	CHGB	8.55e-21	-3.61206	7.66e-25	-2.07391	9.1e-17	-3.43796	2.02e-05	-2.82679	3.52e-10	-3.81254	8.54e-11	-0.527
208433_s_at	LRP8	4.94e-06	0.797888	9.76e-05	0.780593	5.57e-05	0.882914	0.00126	1.7042	0.00292	1.22637	0.00148	0.491
203304_at	BAMBI	3.19e-11	-2.35506	3.14e-11	-2.0492	3.89e-12	-3.11881	3.93e-05	-2.43763	3.4e-05	-2.71419	1.49e-11	-1.04
212580_at	CAST	9.07e-09	-0.991152	0.0206	-0.192747	3.84e-13	-1.61272	0.00133	-1.483	0.000228	-0.907302	0.0207	-0.157
221922_at	GPSM2	3.07e-07	1.78301	2.06e-05	0.830668	0.00194	1.52478	0.000574	1.82443	3.63e-06	2.60308	0.0259	0.417
205100_at	GFPT2	4.94e-23	-3.05277	2.23e-23	-2.24551	3.87e-19	-4.08965	4.42e-06	-3.56448	0.0278	-1.12006	0.0256	-0.329
209894_at	LEPROT///LEPR	2.56e-05	-1.7751	4.08e-05	-1.52266	8.05e-08	-2.83867	0.00186	-2.00507	0.00379	-2.06283	9.52e-07	-0.672
205334_at	S100A1	3.82e-10	3.24177	8.03e-07	1.84902	1.37e-06	1.18328	7.91e-08	3.94109	0.0181	1.36947	0.000225	0.879
218370_s_at	S100PBP	6.64e-11	-1.37357	4.87e-44	-2.25463	7.12e-17	-2.76761	0.000847	-1.31327	0.0437	-0.916768	0.00148	-0.272
202503_s_at	KIAA0101	6.11e-08	2.37559	2e-05	1.58431	8.27e-05	2.02245	2.25e-05	2.93522	1.66e-07	3.49694	2.84e-06	0.858
214710_s_at	CCNB1	3.82e-07	1.92939	0.000132	1.41794	0.00168	1.63685	0.00214	1.59971	3.91e-07	2.91043	0.0161	0.349
219522_at	FJX1	1.07e-09	1.79854	3.11e-06	0.823969	0.00058	1.10471	5.13e-05	2.70978	0.0403	0.955023	0.0233	0.244
209335_at	DCN	2.39e-06	-1.83066	3.32e-05	-2.15118	1.51e-08	-4.93779	0.000477	-2.27292	0.00975	-2.06081	1.8e-07	-1.08
207165_at	HMMR	1.22e-07	2.01712	2.42e-06	1.42979	6.61e-05	2.50482	6.59e-06	3.34594	6.53e-05	2.5621	0.0275	0.447
37512_at	HSD17B6	9.63e-09	-3.06087	2.52e-21	-1.57352	1.04e-17	-5.20598	0.00518	-1.71525	0.029	-1.96459	0.000682	-0.273
38766_at	TMEM265///SRCAP	0.00303	0.411443	3.68e-14	1.37305	3.03e-06	0.76281	0.0125	1.35619	0.0267	0.4318	0.0017	0.333
204115_at	GNG11	1.78e-07	-3.30162	3.97e-10	-2.14425	6.5e-16	-5.02796	0.0212	-0.76061	0.00102	-2.95641	2.9e-08	-0.847
204872_at	TLE4	6.22e-06	-2.30039	5.3e-16	-2.38261	7.96e-09	-4.25469	3.66e-05	-3.0784	0.0146	-2.27595	0.000407	-0.615
214961_at	MTUS2	1.01e-06	-1.19925	2.01e-18	-0.6645	3.89e-20	-1.80086	2.12e-06	-3.38922	4.27e-07	-1.90154	3.73e-06	-0.619
212022_s_at	MKI67	9.3e-09	1.31241	0.000135	0.532142	1.49e-07	1.75761	0.000232	2.33735	0.0166	0.87479	0.00841	0.482
205393_s_at	CHEK1	0.000197	1.1911	0.00509	0.347138	0.0319	0.640279	0.00153	2.1449	5e-05	2.04069	0.00529	0.296
209612_s_at	ADH1B	3.6e-12	-3.18507	1.76e-12	-3.52812	4.44e-24	-7.8594	5.39e-08	-5.73011	7.92e-05	-3.00148	2.74e-13	-0.822
203918_at	PCDH1	3.02e-05	0.669344	1.05e-06	0.873463	0.00016	0.745235	0.00451	1.58798	0.0108	0.574444	2.38e-08	0.792
202208_s_at	ARL4C	0.000479	1.46079	0.035	0.671708	0.00946	1.06122	0.0328	1.11109	0.000388	2.1691	0.00012	0.747
213349_at	TMCC1	2.02e-06	0.998159	0.0281	0.311565	3.71e-05	0.882778	0.0157	0.831418	0.000235	1.32093	0.0497	0.166
36499_at	CELSR2	4.41e-05	1.02692	0.0257	0.428645	0.035	0.576593	0.00145	1.16128	0.0001	1.42198	8.02e-09	0.687
218730_s_at	OGN	3.85e-23	-4.62536	1.46e-15	-2.36917	4.38e-17	-5.76826	4.63e-07	-4.60625	4.92e-05	-3.83294	1.7e-12	-1.52
218355_at	KIF4A	3.43e-10	2.2793	3.2e-10	1.49262	5.81e-07	2.27859	1.7e-08	3.74677	1.26e-07	3.20886	0.0366	0.402
204469_at	PTPRZ1	2.79e-17	-3.44684	1.74e-27	-1.56757	1.98e-12	-4.29121	2.59e-06	-3.69086	3.94e-05	-2.88752	0.0164	-0.183
203418_at	CCNA2	0.000176	1.38886	1.38e-06	1.04199	9.42e-07	1.40611	0.00109	2.72189	0.00891	0.994153	0.0159	0.362
218726_at	HJURP	1e-06	0.988603	1.96e-12	1.28354	2.8e-09	1.7772	0.00264	2.51492	3.15e-05	1.51472	2.31e-06	0.969
202037_s_at	SFRP1	1.2e-14	-2.91661	4.56e-16	-3.1809	1.83e-13	-4.81081	2.5e-07	-5.36145	1.49e-05	-4.02565	3.2e-08	-0.748
217892_s_at	LIMA1	4.72e-06	-0.971124	2.39e-05	-0.94371	1.05e-13	-2.57106	1.15e-06	-2.15852	0.0197	-0.925162	0.0192	-0.232
201847_at	LIPA	3.72e-06	-1.36279	1.47e-08	-2.0862	5.24e-13	-3.76708	1.18e-08	-2.62443	0.0417	-1.03198	0.000366	-0.55
206799_at	SCGB1D2	5.51e-05	2.10141	7.53e-05	1.90115	0.000718	2.33291	0.00224	2.95764	0.0181	2.50045	0.000808	1.21
220668_s_at	DNMT3B	1.11e-06	0.99663	0.00424	0.441412	3.35e-06	1.21308	3.96e-05	1.72739	0.000478	2.1847	0.00502	0.389
206645_s_at	NR0B1	3.82e-11	-1.45044	2.55e-18	-1.3257	6.71e-11	-2.87473	0.00656	-2.17486	0.000156	-2.12904	0.000276	-0.48
205880_at	PRKD1	1.16e-05	-1.14924	1.5e-06	-0.799489	1.52e-09	-2.59133	0.00332	-1.14527	0.0152	-1.16193	1.36e-05	-0.496
210248_at	WNT7A	4.38e-07	1.11668	0.0444	0.475261	0.000105	1.23901	0.000106	2.8308	0.0403	1.12514	5.64e-05	0.765
203953_s_at	CLDN3	8.01e-12	3.25119	2.38e-12	3.89208	3.62e-08	3.11792	0.0324	1.96173	4.8e-07	4.22291	3.8e-11	2.06
213007_at	FANCI	2.15e-08	1.28908	0.000927	0.684842	0.0034	1.0581	0.000101	1.53703	0.000129	1.34899	0.0425	0.3
212606_at	WDFY3	1.18e-07	-1.38178	1.08e-18	-1.79372	2.07e-11	-2.38672	0.000668	-1.28793	0.00344	-1.06465	1.72e-05	-0.433
212097_at	CAV1	1.57e-07	-2.33484	3.15e-11	-2.86996	9.05e-11	-4.98607	2.53e-08	-3.29514	0.0362	-2.16492	0.000295	-0.716
204033_at	TRIP13	9.96e-11	2.21539	2.88e-11	1.78647	4.33e-07	2.39459	0.000171	2.69323	7.07e-08	3.11486	0.00214	0.435
213714_at	CACNB2	3.66e-08	-1.44863	9.8e-21	-1.32765	1.28e-29	-3.06003	3.39e-05	-3.17008	5.73e-10	-1.81998	4.47e-11	-0.96
221520_s_at	CDCA8	6.5e-05	1.20156	8.83e-10	1.07811	1.12e-06	1.4009	0.000314	2.38323	0.000134	1.60071	0.0184	0.734
205907_s_at	OMD	2.29e-14	-2.92575	5.35e-07	-0.826743	2.96e-11	-2.69568	5.91e-06	-4.60758	0.00011	-3.728	1.82e-06	-0.743
204170_s_at	CKS2	6.37e-09	2.35282	4.29e-07	2.36274	4.63e-06	2.10333	3.58e-07	2.76029	4.37e-07	3.44829	0.00117	0.527
202705_at	CCNB2	2.95e-08	2.12791	6.74e-07	1.28522	1.34e-06	2.2362	1.46e-07	3.19051	1.03e-07	3.22223	3.6e-05	0.713
203650_at	PROCR	3.17e-16	-3.98899	5.92e-41	-3.47704	8.8e-20	-5.57576	1.15e-05	-2.85009	6.94e-06	-3.75848	0.0486	-0.319
219010_at	C1orf106	3.11e-12	2.74714	1.52e-11	2.05943	5.79e-09	2.93428	2.01e-07	3.46219	8.31e-09	3.66608	1.02e-08	1.03
201250_s_at	SLC2A1	5.07e-10	2.19463	3.79e-07	1.15661	2.82e-10	2.4782	4.68e-07	3.22496	0.00106	1.16897	2.08e-08	0.74
204822_at	TTK	8.58e-11	2.83576	1.67e-08	1.72728	6.8e-07	2.75037	9.31e-07	3.12656	1.06e-07	3.77696	1.97e-05	0.699
37117_at	PRR5-ARHGAP8///ARHGAP8	1.42e-05	1.19232	0.00354	0.879779	0.00574	1.09186	2.87e-05	1.8075	0.00467	1.32254	4.24e-07	0.664
216733_s_at	GATM	8.88e-09	-2.4288	0.000155	-1.20405	5.57e-12	-3.66426	3.37e-05	-2.74128	0.000651	-2.02415	3.27e-10	-1.24
201896_s_at	PSRC1	1.32e-13	1.7541	2.08e-07	1.06853	9.97e-06	1.35106	2.24e-06	2.6027	5.55e-05	1.95678	0.00708	0.348
204112_s_at	HNMT	1.96e-05	-1.52826	6.41e-07	-1.6061	1.04e-08	-3.32936	0.00282	-1.68053	0.0429	-1.32302	0.0045	-0.551
219317_at	POLI	4.68e-09	-1.32986	2.17e-08	-0.686686	1.46e-13	-2.30187	7.91e-05	-1.45368	0.0181	-0.911526	0.00911	-0.27
220651_s_at	MCM10	1.26e-07	1.55135	2.32e-09	1.09339	1.12e-05	1.95251	0.000754	3.03668	6.7e-05	1.61255	0.0011	0.481
213258_at	TFPI	1.85e-12	-3.15695	4.26e-10	-1.86215	5.95e-13	-4.36819	7.2e-07	-2.96953	4.76e-05	-3.21405	2.43e-07	-0.813
218857_s_at	ASRGL1	6.65e-08	1.62823	5.13e-06	1.4086	1.78e-06	2.7047	0.00158	1.87867	0.000537	2.40967	0.000293	1.06
201291_s_at	TOP2A	9.11e-09	2.49174	1.05e-05	1.71146	1.38e-06	2.66344	0.000219	3.49843	1.72e-06	3.63003	9.55e-06	0.882
209348_s_at	MAF	1.57e-11	-3.12817	2.63e-30	-3.18447	6.55e-14	-5.57129	5.2e-07	-2.18827	0.00191	-3.06055	8.58e-05	-0.599
219588_s_at	NCAPG2	0.00297	1.02638	0.000662	0.455384	0.0151	0.596302	0.0258	1.01808	9e-06	1.29446	0.00104	0.409
214455_at	HIST1H2BC///HIST1H2BI///HIST1H2BE///HIST1H2BF///HIST1H2BG	4.93e-05	2.13227	0.0262	0.378341	0.0082	1.10479	0.0106	2.2242	0.0213	1.98463	0.0207	0.4
204026_s_at	ZWINT	2.23e-06	1.98062	8.48e-05	1.3031	0.0135	1.35859	2.03e-08	3.43629	1.2e-08	3.44629	5.12e-05	0.617
205083_at	AOX1	6.19e-20	-4.7958	5.21e-34	-4.2256	1.26e-22	-6.79271	7.78e-10	-4.55018	1.36e-09	-5.08782	2.86e-12	-1.09
213434_at	STX2	0.00191	-0.613057	5.93e-20	-1.15766	3.51e-16	-2.52866	0.00119	-1.54981	2.92e-06	-1.18088	0.000415	-0.26
204359_at	LOC100506718///FLRT2	4.4e-14	-4.02611	5.87e-22	-4.00834	7.5e-18	-6.25618	1.49e-07	-3.43016	2.84e-06	-4.45494	6.44e-07	-0.913
212423_at	ZCCHC24	9.25e-07	-1.8021	0.0142	-0.709567	3.64e-13	-2.88461	0.0434	-1.22104	0.0195	-1.68563	0.0375	-0.331
219990_at	E2F8	2e-09	2.21078	0.0366	0.36725	0.000432	1.78004	0.00231	1.97262	1.88e-07	2.96278	8.68e-06	0.689
219371_s_at	KLF2	6.13e-13	-2.77591	0.0286	-0.943824	7.33e-17	-3.41867	8.09e-05	-2.40252	1.95e-06	-2.55166	2.01e-13	-1.01
214162_at	ASXL3	0.000238	-1.04545	0.000164	-0.353923	5.43e-09	-1.84786	0.00354	-1.97094	0.00457	-1.88277	8.47e-07	-0.756
212909_at	LYPD1	6.3e-08	3.00585	2.41e-05	2.09881	0.000347	2.64449	0.00423	2.43572	0.000974	3.32932	0.000231	1.16
208651_x_at	CD24	4.37e-12	3.57262	2.96e-15	2.96595	4.43e-11	4.41722	0.000706	2.91773	6.56e-06	4.32264	6.15e-16	1.73
216840_s_at	LAMA2	2.45e-06	-1.97185	0.00468	-0.563164	5.89e-05	-1.75933	0.000884	-1.959	0.000483	-2.28683	3.42e-13	-1.1
205862_at	GREB1	0.00275	-1.90573	2.1e-15	-2.69417	0.00158	-2.64387	0.0352	-1.56297	0.0367	-1.94251	0.000139	-0.893
218204_s_at	FYCO1	1.36e-08	-0.829069	1.84e-22	-1.9963	1.32e-10	-2.62064	2.41e-06	-2.09747	0.00135	-1.1232	0.000367	-0.429
205833_s_at	PART1	9.24e-07	1.97011	0.000507	1.10585	8.36e-06	1.3812	0.00152	2.60771	0.0436	1.57233	0.0031	0.71
218960_at	TMPRSS4	0.00643	1.12197	1.22e-05	1.26178	2.78e-08	2.59762	5.94e-05	3.55526	0.00585	2.02558	0.000576	1.19
211029_x_at	FGF18	0.000337	1.23751	0.00717	0.718539	0.0211	0.958196	0.00436	1.96953	0.00374	1.49338	0.0227	0.616
205407_at	RECK	8.96e-10	-2.87138	1.08e-22	-2.3872	6.27e-14	-4.46496	0.00419	-1.43942	0.00242	-2.44017	5.13e-06	-0.571
203892_at	WFDC2	3.04e-14	3.29092	7.53e-16	3.60428	2.36e-11	3.38142	1.19e-07	3.5026	8.31e-09	4.077	1.18e-18	1.49
201562_s_at	SORD	4.83e-08	0.865011	1.09e-09	0.806358	0.00069	0.916238	0.0309	1.45613	0.00869	0.765325	0.0456	0.185
209832_s_at	CDT1	0.00162	0.597587	2.37e-06	0.786155	0.017	0.514735	0.0294	1.66505	0.00329	0.983374	0.00223	0.325
212789_at	NCAPD3	6.94e-05	1.25351	0.0175	0.33712	7.79e-10	1.68592	0.000973	1.8296	0.02	0.742168	0.0268	0.263
203355_s_at	PSD3	3.59e-09	-1.3809	1.95e-52	-3.31581	2.65e-09	-4.01375	0.000631	-1.82043	1.75e-05	-2.09209	1.23e-05	-0.728
211682_x_at	UGT2B28	2.22e-10	2.47325	3.65e-07	1.09163	5.64e-06	1.9944	0.00652	2.15611	0.000228	2.23719	0.00229	0.763
205532_s_at	CDH6	2.06e-06	2.53492	0.000574	1.31764	0.000378	2.57573	3.27e-05	3.16825	0.000211	3.5992	0.000899	0.881
218285_s_at	BDH2	1.04e-05	-1.1717	3.03e-10	-1.55535	4.76e-13	-3.02596	3.86e-05	-1.62572	0.0103	-1.1532	9.1e-05	-0.5
209676_at	TFPI	4.59e-05	-1.22172	1.26e-05	-0.449612	4.64e-06	-1.12975	0.00167	-2.30462	0.000387	-1.79752	1.58e-05	-0.461
202954_at	UBE2C	1.36e-09	2.026	3.27e-13	2.11696	9.43e-06	1.95034	1.26e-07	2.69992	6.49e-05	2.56879	0.000112	0.698
214595_at	KCNG1	0.000147	1.39936	0.0193	0.341157	0.00138	0.700483	5.97e-05	3.31505	0.0239	1.59135	0.0489	0.397
206201_s_at	MEOX2	1.63e-12	-5.04935	1.78e-17	-1.64994	3.51e-16	-4.97749	1.38e-05	-4.4443	6.98e-05	-3.6419	0.0305	-0.255
205339_at	STIL	1.18e-13	1.69274	0.0107	0.588756	2.91e-07	2.04341	1.52e-05	2.24339	4.05e-09	2.4166	0.000702	0.386
211699_x_at	HBA2///HBA1	4.56e-18	-3.76102	2.17e-05	-2.53219	4.04e-18	-5.48414	0.015	-1.32115	9.36e-07	-3.9091	3.14e-05	-0.863
121_at	PAX8	2.12e-11	2.26734	1.72e-18	1.93382	3.54e-11	1.86373	2.3e-07	2.71602	5.44e-10	3.15999	7.36e-12	0.851
215143_at	DPY19L2P2	0.000109	-1.60086	2.97e-12	-1.3909	8.5e-07	-2.55367	0.00459	-1.51969	0.0435	-1.24706	0.0118	-0.388
211778_s_at	OVOL2	1.05e-12	1.86403	5.58e-09	1.22008	1.94e-08	1.95079	2.21e-06	1.94645	2.55e-06	2.0869	2.83e-09	0.879
212236_x_at	KRT17///JUP	0.000163	1.43872	7.44e-06	1.56386	0.000258	1.84659	0.00754	1.38096	0.000611	1.58789	0.00919	0.486
217525_at	OLFML1	1.89e-11	-2.41179	2.94e-22	-2.44233	2.32e-23	-4.81426	0.000131	-2.79693	0.000144	-2.75947	3.22e-11	-0.791
218308_at	TACC3	1.31e-06	1.55043	1.58e-06	1.34825	0.0027	1.22111	0.00016	2.5775	2.94e-06	2.94815	0.000939	0.855
217080_s_at	HOMER2	4.98e-07	1.49727	5.84e-08	1.15176	1.23e-05	1.55304	0.000484	1.92554	2.23e-05	2.3533	0.000526	0.535
204780_s_at	FAS	1.55e-11	-1.87894	6.08e-12	-1.95853	3.41e-05	-2.45074	1.8e-05	-1.96842	0.0342	-1.05555	0.00177	-0.548
221898_at	PDPN	6.01e-09	-2.12655	5.78e-22	-2.14319	1.35e-11	-3.70301	0.00576	-1.76037	0.000768	-1.82241	0.0275	-0.34
38158_at	ESPL1	1.5e-09	1.10776	4.4e-11	1.01051	4.63e-08	1.5751	1.18e-08	3.23498	0.0284	0.603576	8.71e-05	0.519
41047_at	C9orf16	1.02e-08	1.33681	2.57e-23	2.18643	0.000231	0.78492	1.27e-05	1.89691	0.00231	1.17366	0.00129	0.339
55081_at	MICALL1	1.14e-05	1.01812	0.0104	0.449352	0.0287	0.764156	0.00136	1.3712	0.00308	1.26377	0.00159	0.409
212023_s_at	MKI67	6.12e-07	1.56959	5.07e-06	0.720278	7.05e-06	1.57062	3.53e-08	4.00789	3.89e-06	2.18898	0.0026	0.427
207039_at	CDKN2A	0.00227	1.65826	0.000271	1.58834	0.0102	1.99899	0.000178	4.46916	0.0361	1.98502	0.0103	0.565
201328_at	ETS2	1.51e-05	-1.1474	1.15e-13	-1.55751	1.86e-07	-2.08667	2.19e-05	-1.79073	0.00768	-1.29654	0.0133	-0.293
205906_at	FOXJ1	0.00437	1.03979	0.000221	0.64409	6.33e-08	0.98718	0.0209	1.69315	0.000915	1.8432	0.0262	0.528
202525_at	PRSS8	3.18e-06	1.57271	1.07e-09	2.00305	0.00309	1.05401	0.0211	1.35395	0.00177	1.99946	1.19e-08	0.993
222303_at		1.22e-21	-2.81837	2.44e-18	-2.08563	3.93e-15	-2.84117	0.000666	-2.32563	1.08e-06	-2.49983	0.0239	-0.288
219850_s_at	EHF	1.95e-08	1.86289	0.00409	0.795616	1.51e-05	1.61526	0.0133	2.2717	0.00105	1.64578	1.19e-05	0.91
218729_at	LXN	1.58e-05	-1.04892	2.14e-11	-2.48403	4.84e-15	-4.80839	4.27e-07	-3.34768	4.18e-05	-1.83395	0.0125	-0.384
203176_s_at	TFAM	0.000824	0.81384	0.000217	0.860984	0.0133	0.531562	0.0454	0.900173	0.00385	1.32357	0.0326	0.236
65517_at	AP1M2	2.42e-05	0.847725	2.41e-06	0.798857	0.0283	0.590013	0.0249	1.13589	0.0247	0.799953	3.99e-09	0.765
204389_at	MAOA	1.83e-05	-2.0657	1e-05	-0.398708	1.01e-10	-1.07627	0.0192	-1.00272	0.0161	-1.5422	0.000257	-0.58
204777_s_at	MAL	3.5e-07	3.07961	0.000767	1.94816	0.000517	3.27861	1.48e-05	4.41711	0.0134	3.2922	0.0129	0.832
209172_s_at	CENPF	1.05e-10	2.9317	0.00672	0.509906	6.14e-05	2.17798	2.2e-09	3.93445	1.65e-07	4.13109	0.00373	0.375
205158_at	RNASE4	1.42e-10	-2.35504	3.09e-10	-1.56249	8.83e-25	-4.08143	0.000321	-2.50071	4.74e-06	-2.60772	4.89e-13	-1.24
204798_at	MYB	9.06e-07	2.1082	0.00461	0.657664	5.62e-06	1.98099	0.00454	1.89103	5.42e-05	3.29353	0.00278	0.458
209891_at	SPC25	1.21e-09	1.40753	1.09e-05	0.610281	0.00111	1.37349	2.28e-05	2.78501	1.4e-06	2.97013	0.0113	0.29
214945_at	LOC101930363///LOC101928349///LOC100507387///FAM153C///FAM153A///FAM153B	7.55e-13	-3.91357	1.16e-54	-4.66198	3.9e-14	-6.12732	8.62e-09	-4.17039	2.86e-05	-4.08607	0.00267	-0.57
202613_at	CTPS1	0.000126	1.2068	0.0137	0.50936	0.0133	0.781547	0.00014	1.38078	1.22e-05	2.06839	0.0159	0.267
218663_at	NCAPG	3.64e-05	1.34448	3.66e-05	0.715801	0.00895	1.0904	0.00269	2.28319	0.000193	2.0742	0.000825	0.606
218399_s_at	CDCA4	5.22e-08	1.00607	4.27e-06	0.760147	0.000464	0.779628	0.021	0.890832	0.000104	1.35588	0.00494	0.238
202934_at	HK2	3.83e-05	1.46494	0.0059	0.641579	0.00706	1.06679	0.000217	2.24007	5.37e-05	2.59039	0.0149	0.257
210036_s_at	KCNH2	1.31e-24	2.97862	0.000108	0.608623	7.95e-05	1.13022	0.0261	1.27521	0.00201	2.12507	0.0387	0.346
206102_at	GINS1	2.15e-08	1.85042	1.74e-07	1.53479	0.000283	1.63247	2.05e-05	2.16766	5.54e-06	2.74676	0.00285	0.497
213652_at	PCSK5	3.18e-07	-2.47283	1.47e-25	-1.45631	1.17e-11	-2.52729	0.00795	-1.29397	0.0224	-1.73715	3.63e-08	-0.712
219970_at	GIPC2	3.07e-09	-2.78305	2.45e-21	-1.28625	1.65e-10	-2.68945	0.00016	-2.68719	0.000365	-3.0074	0.000983	-0.368
203612_at	BYSL	1.25e-05	1.05765	1.08e-08	0.681912	0.0189	0.849026	0.0202	1.05959	0.00422	1.38151	0.0176	0.21
202554_s_at	GSTM3	5.86e-05	-1.14364	0.000503	-1.20374	7.2e-08	-3.02452	0.000113	-2.96012	0.0181	-1.36688	2.38e-05	-0.784
213523_at	CCNE1	3.85e-08	1.81353	3.5e-08	1.72752	1.04e-07	2.56344	5.09e-08	3.91888	0.00156	2.46765	0.000769	0.715
205816_at	ITGB8	2.04e-05	1.70974	0.0065	0.524036	0.00175	1.65486	0.0041	1.84861	0.00564	1.97689	0.00431	0.444
204846_at	CP	8.29e-10	3.03842	7.34e-08	2.32908	9.44e-09	4.02254	0.0019	3.45084	0.000641	3.41054	1.16e-11	1.94
33322_i_at	SFN	0.000227	1.51792	0.00328	1.00098	0.0127	1.278	7.59e-06	2.60667	0.000418	2.37142	2e-06	0.829
205157_s_at	KRT17///JUP	7.55e-08	1.52326	0.000268	1.25662	5.23e-05	2.30122	0.0209	1.64429	0.00191	1.34053	0.00799	0.473
211696_x_at	HBB	1.79e-23	-4.67084	6.65e-07	-3.14829	9.77e-22	-7.61344	1.19e-06	-4.16972	2.36e-08	-5.46822	8.56e-06	-0.943
205534_at	PCDH7	0.000147	1.31087	0.00956	0.732726	0.000698	1.91544	0.0014	2.04366	0.0133	1.38441	0.0107	0.551
33767_at	NEFH	0.00109	-2.09944	3.74e-11	-2.06774	0.00126	-2.74823	0.0022	-3.19335	0.0376	-2.30306	0.00591	-0.616
203386_at	TBC1D4	0.000603	-1.48237	9.58e-17	-1.92192	1.29e-06	-2.67955	0.00307	-1.10774	0.0367	-1.37548	1.87e-08	-0.764
202489_s_at	FXYD3	2.21e-05	1.55229	2.68e-07	2.1273	0.000317	1.56708	0.00321	1.67597	0.0103	1.96194	0.000737	0.964
201133_s_at	PJA2	0.000103	-1.27716	9.88e-10	-1.78258	1.63e-08	-2.80623	0.00208	-1.21584	0.00124	-1.1376	2.74e-05	-0.531
205167_s_at	CDC25C	7.4e-08	1.27112	5.45e-12	0.936265	1.07e-06	1.33741	6.55e-06	2.90661	2.35e-06	2.47585	0.00224	0.35
205440_s_at	NPY1R	5.49e-20	-4.88488	6.13e-54	-3.67194	5.82e-30	-6.40945	2.75e-06	-3.74975	7.16e-07	-5.26682	0.031	-0.31
210176_at	TLR1	7.54e-05	-1.06329	1.83e-06	-0.512777	6.36e-07	-1.87978	0.00517	-1.58786	0.00242	-1.40517	0.000153	-0.346
210121_at	B3GALT2	6.9e-17	-2.69431	1.81e-09	-0.37139	4e-15	-2.3344	0.011	-2.28207	6.95e-07	-2.39299	1.57e-08	-0.681
219501_at	ENOX1	4.76e-09	-1.23833	2.27e-05	-0.439688	2.43e-09	-1.09971	0.0448	-1.11118	0.000462	-1.24336	2.97e-06	-0.308
205778_at	KLK7	0.00109	1.51717	0.00198	1.43807	0.00639	1.23179	0.0208	2.01266	0.00222	2.81405	1.13e-07	1.38
218854_at	DSE	4.7e-09	-2.27041	1.09e-21	-3.07949	1.4e-12	-4.95697	7.49e-07	-2.71198	0.00317	-2.20623	0.0249	-0.319
221884_at	MECOM	4.4e-17	4.02647	7.17e-14	2.87032	8.67e-12	4.82825	3.37e-05	4.50563	3.8e-08	5.02099	1.34e-05	0.994
218380_at	LOC728392	0.000161	-1.53686	1.98e-11	-1.73694	2.96e-12	-3.08686	0.00248	-1.7156	0.0466	-2.00158	1.9e-09	-0.78
213353_at	ABCA5	2.98e-18	-2.76769	3.7e-14	-0.919227	1.1e-13	-2.8252	0.00279	-1.64133	0.0114	-1.09509	0.0393	-0.163
204973_at	GJB1	5.25e-05	1.19217	1.4e-05	0.7247	3.3e-06	1.46662	0.0017	1.55978	0.0143	1.47242	0.000455	0.527
210002_at	GATA6	1.62e-05	-2.17502	4.53e-10	-2.86424	2.59e-06	-5.28438	2.94e-05	-3.26039	0.0125	-2.43478	0.00799	-0.693
209784_s_at	JAG2	3.85e-08	1.23843	0.000383	0.730025	2.09e-06	1.15999	0.000609	1.53776	0.00124	1.43454	0.0289	0.307
220327_at	VGLL3	1.37e-13	-3.7828	8.93e-25	-1.09516	1.02e-13	-3.28477	0.000156	-2.82326	0.00015	-3.1602	5.95e-08	-0.508
202148_s_at	PYCR1	2.12e-17	1.82555	0.000955	0.440528	0.0014	0.602836	0.000118	1.42653	5.47e-05	1.72463	0.000211	0.417
209890_at	TSPAN5	1.12e-10	-1.46403	2.63e-28	-1.99182	1.08e-19	-3.09445	0.000518	-3.20336	0.000283	-1.06985	2.59e-08	-0.561
212021_s_at	MKI67	6.65e-05	0.640155	4.65e-08	0.845345	6.59e-05	1.20075	0.000745	1.85106	0.00461	0.593149	0.000235	0.525
202935_s_at	SOX9	5.19e-09	2.68753	0.000489	1.34053	5.66e-05	1.75389	0.00202	2.20771	1.97e-06	3.46108	6.95e-07	1.12
219121_s_at	ESRP1	2.13e-10	1.79828	5.51e-08	1.45341	1.75e-06	1.86778	0.00121	2.25768	0.00137	1.38814	3.26e-14	1.63
205661_s_at	FLAD1	0.00862	0.587264	0.000167	0.77275	0.00465	0.573666	8.92e-05	1.88435	0.0294	0.773433	0.000919	0.293
222077_s_at	RACGAP1	1.7e-06	1.88941	7.23e-06	1.61518	0.0042	1.40166	7.83e-06	2.27934	2.04e-06	3.11455	8.45e-05	0.507
218792_s_at	BSPRY	6.12e-12	1.3678	4.18e-07	0.828048	9.02e-09	1.68349	4.36e-07	2.97509	0.0016	0.978493	0.000342	0.447
204962_s_at	SLC35F6///CENPA	2.36e-09	2.5176	0.00196	0.818173	9.18e-06	2.4037	5.43e-06	3.37541	3.37e-08	3.60624	0.000594	0.554
203680_at	PRKAR2B	2.17e-06	-2.1637	1.92e-11	-2.13829	4.29e-09	-3.69792	2.69e-06	-3.21354	0.0103	-1.92942	2.68e-05	-0.915
201204_s_at	RRBP1	0.00744	0.850319	5.14e-07	1.37719	0.0256	0.462341	0.000765	1.62954	0.00311	1.57867	0.000983	0.322
203060_s_at	PAPSS2	5.24e-13	-2.52226	8.67e-12	-1.962	2.91e-14	-4.57089	2.1e-06	-2.77704	0.000355	-2.54687	0.00193	-0.531
215436_at	HSDL2	1.27e-09	-1.18381	0.0106	-0.263073	2.09e-10	-1.29645	0.0198	-1.18471	0.00084	-1.12969	1.18e-09	-0.701
218151_x_at	SLC52A2	4.28e-06	1.77452	7.19e-05	0.849922	0.000334	1.06814	3.9e-05	2.62677	6.3e-08	2.19665	0.000307	0.509
215388_s_at	CFHR1///CFH	9.77e-06	-2.42164	9.63e-11	-2.35194	1.39e-07	-4.46268	7.03e-05	-2.94728	0.0155	-2.48868	0.00529	-0.569
202575_at	CRABP2	1.52e-09	2.60305	9.49e-14	3.31205	1.55e-06	2.64493	2.14e-05	2.22914	9.8e-10	4.2441	5.28e-06	1.08
201695_s_at	PNP	0.000654	1.21365	0.0101	0.620242	0.0459	0.761438	0.0278	0.92285	0.000879	1.86885	0.000723	0.383
204503_at	EVPL	0.0285	0.377609	0.0378	0.322228	0.0193	0.446144	0.00477	1.95688	0.0326	0.615538	4.51e-05	0.518
201292_at	TOP2A	8.26e-07	2.07829	2.51e-05	1.65158	2.6e-06	3.29248	5.77e-05	2.91624	1.6e-05	3.07157	0.000154	0.734
204018_x_at	HBA2///HBA1	9.2e-17	-3.74551	7.86e-05	-2.4024	6.99e-19	-5.39034	0.0228	-1.3907	1.63e-06	-3.81681	2.06e-05	-0.816
217755_at	HN1	2.55e-05	1.17227	3.97e-09	1.94046	0.000542	1.30458	0.00238	2.18114	0.000105	1.79776	1.95e-05	0.604
205481_at	ADORA1	0.00153	0.556154	2.18e-05	0.549809	0.000282	0.586131	0.00372	1.5953	0.00411	0.75239	0.00537	0.29
201428_at	CLDN4	2.82e-12	2.18741	4.48e-12	2.10179	2.29e-11	2.82874	0.00396	1.91366	9.7e-06	2.12587	5.22e-12	1.5
203740_at	MPHOSPH6	0.00154	-0.445593	2.03e-18	-1.1003	6.01e-09	-1.3514	0.000232	-1.44292	0.00978	-0.783792	0.0115	-0.2
205082_s_at	AOX1	3.59e-07	-1.65862	1.43e-24	-1.54598	2.24e-16	-2.39943	0.015	-1.27283	7.52e-09	-3.25469	2.16e-09	-1.06
221258_s_at	KIF18A	7.14e-06	1.56008	0.000206	0.398046	0.000459	1.21683	0.000281	1.76276	1.16e-05	2.23451	0.0166	0.324
214282_at		3.7e-08	2.01586	0.00167	0.452927	4.42e-05	2.70286	5.88e-06	4.18487	0.00113	2.38647	2.58e-06	0.984
219511_s_at	SNCAIP	9.27e-09	-1.72091	8.38e-28	-2.69503	3.18e-16	-3.65062	1.49e-05	-3.27275	5.36e-07	-2.74077	3.26e-08	-1.15
205980_s_at	PRR5-ARHGAP8///ARHGAP8	5.55e-08	1.17198	0.000959	0.831408	0.00363	1.11018	4.65e-05	3.02966	0.00414	1.33022	4.04e-07	0.851
210046_s_at	IDH2	4.44e-07	2.19611	8.51e-10	2.05831	3.16e-05	2.13457	0.00513	1.48211	1.01e-06	2.83865	0.000856	0.614
205466_s_at	HS3ST1	6.21e-07	-1.9749	3.35e-10	-1.47037	1.23e-07	-2.31027	0.0118	-1.44213	0.000224	-2.27331	2.47e-09	-0.869
201489_at	PPIF	0.000155	1.41714	3.86e-05	1.04424	0.0351	0.719984	0.00273	1.25406	8.82e-05	2.43835	0.00136	0.412
218963_s_at	KRT23	9.47e-07	1.71141	0.000396	1.46399	0.000281	2.33413	0.015	2.23905	0.0252	1.9964	0.00377	0.872
219513_s_at	SH2D3A	2.39e-06	1.12364	0.000107	0.564752	0.00101	0.995161	0.00956	1.55593	0.000201	1.66279	6.34e-05	0.447
204268_at	S100A2	3.3e-08	2.73919	2.21e-06	2.40576	9.74e-05	3.06613	0.00236	3.62578	0.00221	2.44049	1.59e-05	1.15
207808_s_at	PROS1	7.07e-06	-2.30248	4.22e-22	-3.3456	1.36e-09	-4.48571	3.87e-08	-2.97428	0.0257	-1.95726	0.000175	-0.768
217452_s_at	B3GALT2	8.9e-16	-3.45343	1.72e-10	-0.360345	5.76e-11	-1.92165	0.00402	-1.88643	2.12e-06	-1.48719	1.54e-08	-0.465
222155_s_at	SLC52A2	1.3e-12	2.18581	7e-12	2.59254	3.93e-07	1.84685	0.0052	2.03541	6.59e-08	2.82407	0.00048	0.575
200787_s_at	PEA15	5.37e-06	1.49336	8.52e-15	2.25257	2.69e-05	1.16058	0.000319	1.92202	0.000845	2.22114	1.22e-05	0.575
203824_at	TSPAN8	8.24e-07	-3.25637	1.1e-07	-2.26876	4.48e-09	-4.35667	0.00395	-2.28627	0.000117	-3.53128	4.77e-05	-1.04
201890_at	RRM2	1.89e-07	2.20995	0.0148	0.955125	0.00111	2.21846	2.23e-08	3.21525	6.1e-08	3.3152	2.73e-06	0.911
209822_s_at	VLDLR	0.000143	-0.965518	1.44e-09	-1.75438	2.33e-07	-2.57868	8.88e-05	-2.54335	0.0113	-1.43943	1.03e-09	-0.844
208583_x_at	HIST1H2AJ	0.000315	1.89598	1.33e-06	0.775898	0.00033	0.891859	0.028	1.49204	0.00195	1.75072	0.0246	0.331
217414_x_at	HBA2///HBA1	4.84e-20	-4.10599	5.35e-05	-2.51852	1.02e-19	-5.9369	2.42e-05	-3.17064	3.63e-06	-3.66208	7.75e-05	-0.883
205584_at	ALG13	1.41e-07	-1.17675	2.95e-11	-0.583227	3.03e-13	-2.27569	0.0345	-1.08064	0.0457	-0.856776	0.000509	-0.373
202510_s_at	TNFAIP2	0.000341	0.857153	6.87e-06	1.31969	0.0459	0.717311	0.00578	1.20504	0.0177	1.01282	4.15e-05	0.82
209164_s_at	CYB561	2.29e-06	0.977714	0.000286	0.590002	0.0026	1.03439	0.0473	0.897035	0.0355	0.603488	3.07e-06	0.484
209437_s_at	SPON1	0.026	1.0614	9.51e-06	1.75573	4.99e-05	2.29674	1.37e-09	4.96155	0.000625	2.53594	0.0337	0.547
213226_at	CCNA2	8.01e-08	1.602	9.46e-05	0.930849	0.000425	1.41119	1.78e-05	1.89609	2.04e-07	2.67337	0.00101	0.388
203501_at	CPQ	0.000136	-0.921487	6.87e-06	-0.859664	1.48e-08	-2.31735	4.21e-05	-1.90424	0.0349	-0.685921	2.3e-05	-0.48
204823_at	NAV3	0.00461	-0.66301	4.71e-12	-1.38321	8.38e-15	-2.88322	2.44e-06	-3.44237	1.86e-05	-1.69305	1.18e-13	-1.1
