# Supplementary material for: A Robust Gene Expression Prognostic Signature for Overall Survival in High-Grade Serous Ovarian Cancer
Source: J Oncol. 2019 Nov 7;2019:3614207. doi: 10.1155/2019/3614207 (PMC6925684; doi:10.1155/2019/3614207)
Supplement: Supplementary Materials — Table S1: summary of independent validation of the 11-gene signature in 9 datasets. Table S2: list of genes that are consistently deregulated in HGSOC across six datasets using criteria: adjusted p < 0.05 and fold change >1.5. Table S3: the impact of deregulated genes on overall survival (OS). Genes significantly associated with OS are highlighted in yellow. Table S4: top 20 altered gene clusters identified in the 232 deregulated genes that are significantly associated with OS. Gene set enrichment analysis was conducted using Metascape (http://metascape.org). Count represents the number of genes with membership in the given ontology term. “%” represents the percentage of total 232 genes associated with OS that are found in the given ontology term. Log10 (p) is the p-value in log base 10. Table S5: frequency by which each gene appeared in the Cox regression model among 100 resampling training sets. The signature genes are highlighted in yellow. Table S6: the function and role of 11 genes in the prognostic signature in normal and HGSOC cells. Table S7: the average Cox regression coefficient for each gene used to calculate the prognostic score. [file 3614207.f1.zip › 3614207.f1/Supplementary Table 3.xlsx]

## Sheet: Sheet1
Supplementary Table 3 The impact of deregulated genes on overall survival (OS). The genes that are significantly associated with OS are highlighted in yellow.
Gene symbol	HR(95% CI)	logrank P
GFPT2	1.58 (1.31 − 1.89)	7.3e-07
HSD17B6	1.47 (1.25 − 1.72)	1.8e-06
LOC101928635///ALDH1A2	1.44 (1.23 − 1.68)	4.9e-06
NPY1R	1.34 (1.18 − 1.52)	9.5e-06
PART1	0.67 (0.56 − 0.8)	1.2e-05
SNCA	1.4 (1.2 − 1.63)	1.5e-05
GATA6	1.43 (1.21 − 1.68)	1.5e-05
EDNRA	1.4 (1.19 − 1.64)	2.9e-05
PMP22	1.39 (1.19 − 1.62)	3.6e-05
PDLIM3	1.4 (1.19 − 1.65)	3.8e-05
ADH1B	1.42 (1.2 − 1.67)	4.1e-05
NUDT11	1.4 (1.19 − 1.66)	5.8e-05
TNFAIP2	0.7 (0.58 − 0.83)	6.2e-05
PROCR	1.36 (1.16 − 1.58)	8.7e-05
GABARAPL1	1.37 (1.16 − 1.61)	0.00015
SNAI2	1.36 (1.16 − 1.59)	0.00015
ENOX1	1.33 (1.14 − 1.55)	0.00022
NR2F1	1.42 (1.18 − 1.71)	0.00023
RAB31	1.37 (1.16 − 1.62)	0.00025
MAL	1.33 (1.14 − 1.55)	0.00025
GHR	1.35 (1.15 − 1.6)	0.00026
DSE	1.33 (1.14 − 1.55)	0.00027
GJB1	0.75 (0.65 − 0.88)	0.00029
VGLL1	1.38 (1.16 − 1.65)	0.0003
CLDN4	1.35 (1.15 − 1.59)	0.0003
LOC102725213///LOC100507387///FAM153A///FAM153B	0.75 (0.65 − 0.88)	0.00033
CCNE2	1.36 (1.15 − 1.6)	0.00035
CCNE1	1.34 (1.14 − 1.57)	0.00039
BACH2	1.32 (1.13 − 1.55)	0.00041
FEN1	0.73 (0.62 − 0.87)	0.00041
GALNT10	1.34 (1.14 − 1.58)	0.00043
CYB561	0.76 (0.65 − 0.89)	0.00044
EFEMP1	1.31 (1.12 − 1.53)	0.00053
LOC101926921///DAB2	1.35 (1.14 − 1.6)	0.00056
MYBL2	1.32 (1.13 − 1.56)	0.00058
TOP2A	1.32 (1.13 − 1.55)	0.00063
MEOX2	1.33 (1.13 − 1.57)	0.00067
FOXJ1	0.77 (0.66 − 0.89)	0.00068
HLF	0.75 (0.63 − 0.89)	0.00078
TMEM265///SRCAP	0.76 (0.64 − 0.89)	0.00079
LYPD1	0.75 (0.63 − 0.89)	0.00082
PCSK5	1.34 (1.13 − 1.59)	0.00087
ZEB2	1.31 (1.12 − 1.54)	0.00091
MKI67	1.37 (1.13 − 1.65)	0.001
PDPN	1.29 (1.11 − 1.51)	0.0011
SPON1	0.77 (0.66 − 0.9)	0.0011
MAF	1.32 (1.12 − 1.57)	0.0012
PCOLCE2	1.3 (1.11 − 1.54)	0.0013
CRABP2	1.36 (1.13 − 1.63)	0.0013
MREG	0.78 (0.67 − 0.91)	0.0014
KIF20A	1.35 (1.12 − 1.63)	0.0015
TMPRSS4	0.76 (0.64 − 0.9)	0.0015
PDGFD	1.29 (1.1 − 1.51)	0.0017
KLK8	0.78 (0.67 − 0.91)	0.0017
PLAGL2	0.77 (0.65 − 0.91)	0.0019
DCN	1.27 (1.09 − 1.48)	0.0019
UBE2C	1.28 (1.09 − 1.49)	0.0019
CALB2	1.29 (1.1 − 1.51)	0.0021
GATA4	0.76 (0.64 − 0.91)	0.0021
ECM2	1.3 (1.1 − 1.55)	0.0021
CENPF	1.33 (1.11 − 1.59)	0.0022
KRT23	0.79 (0.68 − 0.92)	0.0023
ALG13	0.76 (0.63 − 0.91)	0.0024
OMD	1.28 (1.09 − 1.51)	0.0025
CADPS2	0.79 (0.68 − 0.92)	0.0027
RNF128	1.3 (1.1 − 1.55)	0.0027
NR2F6	1.28 (1.09 − 1.5)	0.0027
TEAD4	1.27 (1.09 − 1.49)	0.0028
PDGFRA	1.29 (1.09 − 1.52)	0.003
ZCCHC24	1.27 (1.09 − 1.49)	0.003
PJA2	1.3 (1.09 − 1.55)	0.0031
SCGB2A1	0.8 (0.68 − 0.93)	0.0032
VGLL3	1.27 (1.08 − 1.49)	0.0034
PYCR1	0.78 (0.66 − 0.92)	0.0035
PRAME	0.78 (0.66 − 0.92)	0.0036
L1CAM	1.31 (1.09 − 1.58)	0.0037
ASRGL1	0.79 (0.68 − 0.93)	0.0038
KCNG1	1.26 (1.08 − 1.48)	0.004
LEPROT///LEPR	1.26 (1.08 − 1.48)	0.0042
GNG11	1.26 (1.08 − 1.49)	0.0043
SDC1	1.26 (1.07 − 1.47)	0.0044
CEP55	1.3 (1.08 − 1.55)	0.0047
SHCBP1	1.3 (1.08 − 1.56)	0.0049
SPC25	1.28 (1.08 − 1.53)	0.0049
SDC2	1.3 (1.08 − 1.56)	0.0053
TFPI	1.24 (1.07 − 1.45)	0.0054
ITGB8	1.25 (1.07 − 1.47)	0.0054
SFN	1.24 (1.07 − 1.45)	0.0055
PTGIS	1.26 (1.07 − 1.48)	0.0055
TUBA4A	1.26 (1.07 − 1.48)	0.0056
NCAPG	1.29 (1.08 − 1.55)	0.0056
KLHL4	0.8 (0.68 − 0.94)	0.0064
LOC100506718///FLRT2	1.24 (1.06 − 1.45)	0.0064
BYSL	0.8 (0.68 − 0.94)	0.0069
OGN	1.24 (1.06 − 1.44)	0.0075
ADH1C	1.28 (1.07 − 1.53)	0.0078
ZEB1	1.27 (1.06 − 1.51)	0.0079
SNX1	1.27 (1.06 − 1.52)	0.008
FJX1	0.81 (0.7 − 0.95)	0.0088
MEF2C	1.22 (1.05 − 1.43)	0.0092
OLFML1	1.24 (1.05 − 1.46)	0.0092
GIPC2	1.23 (1.05 − 1.43)	0.0092
DNMT3B	1.26 (1.06 − 1.51)	0.0096
FOLR1	0.81 (0.7 − 0.95)	0.0097
RAD51AP1	1.26 (1.06 − 1.51)	0.0097
AKT3	1.22 (1.05 − 1.42)	0.0098
GLDC	1.26 (1.06 − 1.51)	0.0098
MECOM	0.81 (0.68 − 0.95)	0.0098
CCNB1	1.24 (1.05 − 1.47)	0.01
SMPDL3A	1.23 (1.05 − 1.45)	0.011
CENPU	1.26 (1.05 − 1.52)	0.011
RBM5	0.81 (0.69 − 0.95)	0.011
KCNJ8	1.22 (1.05 − 1.42)	0.011
FBXL7	1.22 (1.05 − 1.42)	0.011
GREB1	0.82 (0.7 − 0.96)	0.011
HIST1H2AJ	0.82 (0.7 − 0.95)	0.011
WDFY3	1.22 (1.04 − 1.42)	0.012
RECK	1.24 (1.05 − 1.47)	0.012
UGT2B28	0.8 (0.67 − 0.95)	0.012
CP	0.82 (0.7 − 0.96)	0.012
PAPSS2	1.25 (1.05 − 1.48)	0.012
ALAD	1.21 (1.04 − 1.41)	0.013
MRPL12	0.81 (0.68 − 0.96)	0.013
DLGAP5	1.22 (1.04 − 1.42)	0.013
ELF3	1.23 (1.04 − 1.44)	0.014
TTC39A	1.22 (1.04 − 1.44)	0.014
CD82	0.83 (0.71 − 0.96)	0.014
MYB	0.83 (0.71 − 0.96)	0.014
FRY	1.25 (1.04 − 1.49)	0.015
CDKN3	1.21 (1.04 − 1.41)	0.015
TNXB///TNXA	0.83 (0.71 − 0.96)	0.015
PDE10A	1.21 (1.04 − 1.41)	0.016
TCEAL2	1.23 (1.04 − 1.45)	0.016
RGL1	0.83 (0.71 − 0.97)	0.016
ECT2	1.24 (1.04 − 1.47)	0.016
COL4A6	1.21 (1.04 − 1.42)	0.016
E2F8	1.24 (1.04 − 1.48)	0.016
FLAD1	0.83 (0.71 − 0.97)	0.016
DEFB1	0.82 (0.69 − 0.96)	0.017
KIF11	1.23 (1.04 − 1.45)	0.017
MPZL2	0.82 (0.7 − 0.97)	0.017
RMND5A	1.25 (1.04 − 1.5)	0.017
SFRP1	1.23 (1.04 − 1.47)	0.017
CLEC4M	0.82 (0.7 − 0.97)	0.018
KLF2	1.23 (1.04 − 1.46)	0.018
SORD	0.83 (0.71 − 0.97)	0.018
LY75-CD302///CD302///LY75	1.2 (1.03 − 1.4)	0.019
GTF2IRD1	1.24 (1.04 − 1.48)	0.019
AGPAT2	0.81 (0.69 − 0.97)	0.019
KIF18B	1.24 (1.03 − 1.48)	0.02
BBS4	0.82 (0.69 − 0.97)	0.02
KIF15	1.22 (1.03 − 1.45)	0.02
FAM64A	1.2 (1.03 − 1.39)	0.021
ZWINT	1.23 (1.03 − 1.46)	0.021
SLC35F6///CENPA	1.22 (1.03 − 1.45)	0.021
TSPAN8	0.84 (0.72 − 0.97)	0.021
UNC5B	1.23 (1.03 − 1.47)	0.022
VEGFA	0.84 (0.72 − 0.97)	0.022
POLI	0.84 (0.72 − 0.97)	0.022
KCNH2	0.83 (0.72 − 0.97)	0.022
MTHFD2	1.21 (1.03 − 1.43)	0.023
HMGA1	0.82 (0.69 − 0.97)	0.023
HBD	0.83 (0.71 − 0.98)	0.023
DYRK2	1.23 (1.03 − 1.47)	0.023
GPM6A	0.81 (0.68 − 0.97)	0.023
CELSR2	0.84 (0.72 − 0.98)	0.023
DPP3	1.22 (1.03 − 1.46)	0.025
PEG3	0.84 (0.72 − 0.98)	0.025
EHF	0.84 (0.72 − 0.98)	0.025
WBSCR22	1.19 (1.02 − 1.39)	0.026
TSPAN15	1.2 (1.02 − 1.42)	0.026
BUB1B	1.21 (1.02 − 1.42)	0.026
TLR1	0.83 (0.71 − 0.98)	0.026
PPIF	0.84 (0.72 − 0.98)	0.027
CDH6	0.83 (0.7 − 0.98)	0.028
ARHGEF10	1.2 (1.02 − 1.41)	0.028
NDN	1.21 (1.02 − 1.43)	0.029
SESN1	0.84 (0.72 − 0.98)	0.029
CDC20	1.18 (1.02 − 1.38)	0.029
NCAPG2	0.84 (0.72 − 0.98)	0.029
SOX9	1.19 (1.02 − 1.39)	0.029
BUB1	1.18 (1.02 − 1.38)	0.03
N4BP2L1	0.82 (0.69 − 0.98)	0.03
LOC101930400///AKR1C2	1.22 (1.02 − 1.45)	0.03
C7	0.84 (0.72 − 0.98)	0.03
SCRIB	1.19 (1.02 − 1.4)	0.031
KIAA0101	1.21 (1.02 − 1.44)	0.031
PCDH7	1.19 (1.02 − 1.4)	0.031
MAOB	0.84 (0.72 − 0.99)	0.032
DIXDC1	0.83 (0.7 − 0.98)	0.032
KLF4	0.84 (0.72 − 0.99)	0.032
MAOA	1.18 (1.01 − 1.38)	0.033
TFAP2A	0.83 (0.7 − 0.99)	0.033
TLE4	1.21 (1.02 − 1.45)	0.033
ARL4C	1.19 (1.01 − 1.4)	0.033
CDKN2A	1.2 (1.01 − 1.42)	0.033
GPSM2	1.2 (1.01 − 1.43)	0.034
ADAP1	0.85 (0.73 − 0.99)	0.034
TPX2	1.21 (1.01 − 1.45)	0.034
RUFY3	0.84 (0.72 − 0.99)	0.035
WFDC2	0.84 (0.71 − 0.99)	0.035
PSMC2	1.18 (1.01 − 1.38)	0.036
NLGN4X	1.18 (1.01 − 1.37)	0.037
LGALS8	1.2 (1.01 − 1.42)	0.038
LOC101930363///LOC101928349///LOC100507387///FAM153C///FAM153A///FAM153B	0.84 (0.71 − 0.99)	0.038
CCND1	1.2 (1.01 − 1.42)	0.039
BCL11A	0.84 (0.71 − 0.99)	0.039
ZNF671	0.83 (0.69 − 0.99)	0.04
C9orf16	0.84 (0.71 − 0.99)	0.04
HOMER2	0.83 (0.7 − 0.99)	0.04
NUP210	0.85 (0.73 − 0.99)	0.041
NBEA	1.18 (1.01 − 1.38)	0.042
PCDH1	0.85 (0.73 − 0.99)	0.042
GSTM3	1.17 (1.01 − 1.37)	0.042
CIRBP	0.85 (0.72 − 0.99)	0.043
RAP1GAP	1.18 (1 − 1.38)	0.043
PAX8	0.85 (0.73 − 1)	0.043
TACC3	1.17 (1 − 1.37)	0.043
CHEK1	1.19 (1 − 1.4)	0.044
KIAA0368	0.84 (0.71 − 1)	0.044
PEA15	1.19 (1 − 1.41)	0.044
NEK2	1.17 (1 − 1.37)	0.045
FAM46A	1.18 (1 − 1.39)	0.046
TK1	0.85 (0.73 − 1)	0.046
KLF9	1.19 (1 − 1.41)	0.046
MYCL	0.85 (0.72 − 1)	0.047
EVPL	0.84 (0.7 − 1)	0.047
SMC4	1.17 (1 − 1.37)	0.048
SOCS2	0.85 (0.72 − 1)	0.049
DFNA5	1.17 (1 − 1.38)	0.049
EZH2	1.18 (1 − 1.39)	0.049
PKD2	1.18 (1 − 1.39)	0.049
SFMBT1	1.2 (1 − 1.43)	0.05
CCNF	0.85 (0.72 − 1)	0.05
LIPA	1.19 (1 − 1.42)	0.05
HOXC6	1.17 (1 − 1.37)	0.051
DTL	1.17 (1 − 1.36)	0.052
HIST1H2BD	0.86 (0.73 − 1)	0.052
RECQL4	1.16 (1 − 1.36)	0.053
LLGL2	0.85 (0.72 − 1)	0.055
DHRS7	1.17 (1 − 1.38)	0.055
WDR19	0.86 (0.74 − 1)	0.055
S100A1	0.86 (0.74 − 1)	0.055
HJURP	1.16 (1 − 1.36)	0.055
CKS2	1.18 (0.99 − 1.41)	0.057
PRR5-ARHGAP8///ARHGAP8	1.19 (0.99 − 1.43)	0.057
SLC39A4	1.18 (0.99 − 1.41)	0.058
B3GALT2	1.18 (0.99 − 1.41)	0.058
HSDL2	0.86 (0.73 − 1.01)	0.058
FAM171A1	1.16 (0.99 − 1.35)	0.059
HBA2///HBA1	1.18 (0.99 − 1.41)	0.059
RACGAP1	1.18 (0.99 − 1.41)	0.059
LARP4B	1.17 (0.99 − 1.39)	0.06
HMMR	1.16 (0.99 − 1.36)	0.06
SOX17	0.85 (0.72 − 1.01)	0.061
BIRC5	0.86 (0.73 − 1.01)	0.061
LAMA2	0.84 (0.7 − 1.01)	0.061
SCGB1D2	0.85 (0.71 − 1.01)	0.062
GINS1	1.18 (0.99 − 1.4)	0.063
CLDN3	1.15 (0.99 − 1.34)	0.065
TSPAN5	1.18 (0.99 − 1.41)	0.066
EIF2AK2	0.87 (0.74 − 1.01)	0.067
FAS	1.16 (0.99 − 1.36)	0.067
DENND5B	0.87 (0.74 − 1.01)	0.068
UFSP2	1.16 (0.99 − 1.36)	0.069
TRPC1	1.15 (0.99 − 1.34)	0.07
KRT17///JUP	1.15 (0.99 − 1.34)	0.072
WHSC1	1.15 (0.99 − 1.34)	0.077
CD24	1.16 (0.98 − 1.38)	0.079
PRKD1	1.17 (0.98 − 1.38)	0.079
STC2	0.87 (0.74 − 1.02)	0.08
SNORA5B///TBRG4	0.86 (0.73 − 1.02)	0.08
KIF2C	1.15 (0.98 − 1.34)	0.081
DNA2	1.15 (0.98 − 1.33)	0.082
PRSS2	0.87 (0.75 − 1.02)	0.083
ME1	0.85 (0.71 − 1.02)	0.084
SLC2A1	1.14 (0.98 − 1.33)	0.084
PSRC1	1.15 (0.98 − 1.36)	0.084
TFAM	1.15 (0.98 − 1.36)	0.084
ABHD11	1.16 (0.98 − 1.38)	0.085
RRM2	1.14 (0.98 − 1.33)	0.085
RNASEH2A	1.17 (0.98 − 1.39)	0.086
CCDC68	0.87 (0.73 − 1.02)	0.087
ALDH1A1	0.85 (0.71 − 1.02)	0.088
CFH	1.16 (0.98 − 1.39)	0.088
ESPL1	1.14 (0.98 − 1.33)	0.088
CKS1B	1.15 (0.98 − 1.35)	0.089
LOC728392	1.16 (0.98 − 1.38)	0.089
LNPEP	1.15 (0.98 − 1.34)	0.09
SNCAIP	1.14 (0.98 − 1.34)	0.09
DMD	0.86 (0.72 − 1.02)	0.091
GPM6B	0.87 (0.74 − 1.02)	0.092
HIST2H2AA4///HIST2H2AA3	0.86 (0.72 − 1.02)	0.092
HS3ST1	1.16 (0.98 − 1.38)	0.092
PYCRL	0.88 (0.75 − 1.02)	0.094
NAP1L3	1.14 (0.98 − 1.33)	0.096
CTSO	0.87 (0.74 − 1.03)	0.096
MIR1178///CIT	1.14 (0.98 − 1.33)	0.096
PRKY///PRKX	0.87 (0.73 − 1.03)	0.096
PTPRZ1	0.86 (0.71 − 1.03)	0.096
ABCA8	1.16 (0.97 − 1.39)	0.097
BSPRY	0.88 (0.75 − 1.02)	0.097
MELK	0.88 (0.75 − 1.02)	0.098
C1orf106	0.87 (0.74 − 1.03)	0.098
CLEC5A	1.14 (0.98 − 1.33)	0.099
PRC1	1.16 (0.97 − 1.38)	0.1
ZFPM2	1.14 (0.97 − 1.32)	0.1
LCN2	0.87 (0.73 − 1.03)	0.1
FOXO1	1.15 (0.97 − 1.35)	0.1
TIMELESS	1.14 (0.98 − 1.33)	0.1
HBG2///HBG1	1.15 (0.97 − 1.37)	0.1
LIMA1	1.15 (0.97 − 1.37)	0.1
CDT1	0.86 (0.73 − 1.03)	0.1
HBB	1.16 (0.97 − 1.38)	0.1
TYMS	1.13 (0.97 − 1.32)	0.11
MCM4	1.13 (0.97 − 1.32)	0.11
MTUS1	1.13 (0.97 − 1.32)	0.11
GPRASP1	0.86 (0.72 − 1.04)	0.11
THBD	1.14 (0.97 − 1.34)	0.11
EIF1	0.87 (0.73 − 1.03)	0.11
ALDH3B2	0.88 (0.76 − 1.03)	0.11
RAD54L	1.13 (0.97 − 1.32)	0.11
DDX11	1.14 (0.97 − 1.32)	0.11
PLCL2	0.87 (0.74 − 1.03)	0.11
GCOM1///POLR2M	1.15 (0.97 − 1.37)	0.11
TES	1.15 (0.97 − 1.36)	0.11
GATM	1.14 (0.97 − 1.34)	0.11
S100PBP	1.13 (0.97 − 1.32)	0.11
CAV1	1.14 (0.97 − 1.33)	0.11
CCNB2	1.14 (0.97 − 1.35)	0.11
PROS1	1.15 (0.97 − 1.37)	0.11
CCNA2	1.13 (0.97 − 1.32)	0.11
EXO1	1.15 (0.97 − 1.36)	0.12
FOXM1	1.14 (0.97 − 1.34)	0.12
CENPM	0.88 (0.75 − 1.03)	0.12
CLDN7	0.89 (0.76 − 1.03)	0.12
FARSA	0.87 (0.73 − 1.04)	0.12
CX3CL1	0.88 (0.76 − 1.03)	0.12
HIST1H2BC///HIST1H2BI///HIST1H2BE///HIST1H2BF///HIST1H2BG	0.87 (0.73 − 1.04)	0.12
STX2	0.87 (0.72 − 1.04)	0.12
KIF18A	0.88 (0.75 − 1.03)	0.12
NAV3	1.13 (0.97 − 1.31)	0.12
S100A14	0.89 (0.76 − 1.04)	0.13
CREBL2	0.89 (0.76 − 1.04)	0.13
CNIH3	0.88 (0.75 − 1.04)	0.13
DAPK1	1.14 (0.96 − 1.36)	0.13
ATP10D	1.13 (0.97 − 1.31)	0.13
RFPL1S	0.89 (0.76 − 1.03)	0.13
TRIP13	1.13 (0.97 − 1.32)	0.13
CDCA8	1.14 (0.97 − 1.34)	0.13
PSD3	1.15 (0.96 − 1.37)	0.13
KLK7	1.12 (0.97 − 1.31)	0.13
DPYD	0.89 (0.77 − 1.04)	0.14
RALA	1.14 (0.96 − 1.37)	0.14
CDC7	0.89 (0.76 − 1.04)	0.14
SLC12A7	0.89 (0.76 − 1.04)	0.14
MMP7	1.14 (0.96 − 1.34)	0.14
TMC6	0.89 (0.75 − 1.04)	0.14
FCHO1	0.88 (0.74 − 1.04)	0.14
CMAHP	0.87 (0.73 − 1.04)	0.14
KIF14	1.14 (0.95 − 1.37)	0.14
PKMYT1	1.12 (0.96 − 1.31)	0.14
TMCC1	1.13 (0.96 − 1.34)	0.14
FXYD3	0.88 (0.74 − 1.04)	0.14
VLDLR	0.88 (0.74 − 1.04)	0.14
SH3GL2	0.89 (0.76 − 1.04)	0.15
SOBP	0.89 (0.77 − 1.04)	0.15
ST14	0.89 (0.75 − 1.04)	0.15
MAD2L1	1.13 (0.95 − 1.34)	0.15
VTCN1	1.14 (0.95 − 1.37)	0.15
MUC1	1.12 (0.96 − 1.3)	0.15
STIL	1.13 (0.96 − 1.33)	0.15
LXN	1.12 (0.96 − 1.31)	0.15
ADORA1	1.14 (0.95 − 1.38)	0.15
AOX1	1.12 (0.96 − 1.3)	0.15
DIRAS3	0.9 (0.77 − 1.05)	0.16
HAS1	1.13 (0.95 − 1.35)	0.16
SULT1C2	1.13 (0.95 − 1.34)	0.16
ZNF211	1.12 (0.96 − 1.3)	0.16
CSGALNACT1	1.13 (0.95 − 1.35)	0.16
JAG2	1.12 (0.96 − 1.3)	0.16
PBK	1.12 (0.96 − 1.32)	0.16
CACNB2	1.11 (0.96 − 1.3)	0.16
CDCA4	1.12 (0.95 − 1.31)	0.16
TNNT1	0.9 (0.77 − 1.05)	0.17
UBTD1	1.12 (0.95 − 1.31)	0.17
PLCL1	1.11 (0.95 − 1.3)	0.17
LRP8	0.89 (0.75 − 1.05)	0.17
BDH2	1.11 (0.95 − 1.3)	0.17
TBC1D4	1.12 (0.95 − 1.3)	0.17
MPHOSPH8	0.9 (0.77 − 1.05)	0.18
BCL2	1.11 (0.95 − 1.29)	0.18
BIK	0.89 (0.75 − 1.05)	0.18
ATP6V0E2	1.12 (0.95 − 1.31)	0.18
FANCI	1.13 (0.95 − 1.34)	0.18
FGF18	1.12 (0.95 − 1.32)	0.18
OVOL2	1.12 (0.95 − 1.32)	0.18
RRBP1	0.9 (0.77 − 1.05)	0.18
HN1	1.11 (0.95 − 1.3)	0.19
SYT1	1.11 (0.95 − 1.29)	0.2
KLK6	0.9 (0.77 − 1.05)	0.2
RNASE4	1.11 (0.95 − 1.29)	0.2
EPCAM	1.12 (0.94 − 1.32)	0.2
SMARCA2	0.9 (0.77 − 1.06)	0.2
MCM10	1.1 (0.95 − 1.29)	0.2
HK2	1.11 (0.95 − 1.29)	0.2
CYP39A1	0.89 (0.75 − 1.07)	0.21
KIF4A	0.91 (0.78 − 1.06)	0.21
MICALL1	1.11 (0.94 − 1.32)	0.21
IDH2	0.9 (0.76 − 1.06)	0.21
CBLC	1.11 (0.94 − 1.31)	0.22
SORT1	1.11 (0.94 − 1.31)	0.22
MPHOSPH6	0.9 (0.77 − 1.06)	0.22
SLC34A2	0.91 (0.78 − 1.06)	0.23
C21orf62	0.91 (0.77 − 1.06)	0.23
ARHGAP6	1.1 (0.94 − 1.28)	0.23
CERK	1.1 (0.94 − 1.29)	0.23
CXorf57	0.91 (0.78 − 1.07)	0.24
CHD7	1.1 (0.94 − 1.29)	0.24
RYR2	0.91 (0.77 − 1.07)	0.24
HMGB3	1.11 (0.93 − 1.31)	0.24
PRKAR2B	1.11 (0.93 − 1.32)	0.24
AP1M2	1.1 (0.94 − 1.29)	0.25
SH2D3A	0.91 (0.77 − 1.07)	0.25
FYCO1	1.1 (0.93 − 1.31)	0.26
MICALL2	0.91 (0.78 − 1.07)	0.27
OR7E37P	0.91 (0.78 − 1.07)	0.27
PFKP	0.91 (0.78 − 1.07)	0.27
CLK1	0.92 (0.79 − 1.07)	0.28
DPY19L2P2	1.1 (0.92 − 1.32)	0.28
RASAL1	1.09 (0.93 − 1.29)	0.29
PSAT1	0.92 (0.79 − 1.07)	0.29
ANG	1.1 (0.92 − 1.31)	0.29
WNT7A	1.09 (0.93 − 1.28)	0.29
MCM2	1.1 (0.92 − 1.31)	0.3
PBX3	0.92 (0.78 − 1.08)	0.3
CNNM4	1.09 (0.93 − 1.27)	0.3
NR3C2	1.09 (0.93 − 1.29)	0.3
CFHR1///CFH	1.09 (0.92 − 1.29)	0.3
CAV2	0.91 (0.76 − 1.09)	0.31
NR0B1	1.09 (0.93 − 1.28)	0.31
S100A2	1.08 (0.93 − 1.26)	0.31
SLC16A4	0.92 (0.78 − 1.08)	0.32
PRSS3	0.92 (0.78 − 1.08)	0.32
ETS2	1.09 (0.92 − 1.3)	0.32
PRSS8	0.92 (0.79 − 1.08)	0.32
MIR4680///PDCD4	0.93 (0.79 − 1.08)	0.33
SYNE1	1.08 (0.92 − 1.26)	0.34
BAMBI	1.08 (0.92 − 1.27)	0.34
ESRP1	0.93 (0.8 − 1.08)	0.34
AURKB	0.93 (0.79 − 1.09)	0.36
VANGL1	0.93 (0.79 − 1.09)	0.37
HNMT	1.07 (0.92 − 1.25)	0.38
TTK	1.07 (0.92 − 1.25)	0.39
NAP1L2	1.07 (0.91 − 1.25)	0.4
CHGB	1.08 (0.91 − 1.29)	0.4
EYA2	1.07 (0.91 − 1.27)	0.41
RABGAP1L	1.07 (0.91 − 1.25)	0.43
GRHL2	0.94 (0.8 − 1.1)	0.43
DPH2	0.94 (0.8 − 1.1)	0.44
NEFH	0.94 (0.8 − 1.1)	0.45
NCAPD3	0.95 (0.81 − 1.12)	0.55
CDC25C	1.05 (0.9 − 1.22)	0.56
