# Supplementary material for: A Robust Gene Expression Prognostic Signature for Overall Survival in High-Grade Serous Ovarian Cancer
Source: J Oncol. 2019 Nov 7;2019:3614207. doi: 10.1155/2019/3614207 (PMC6925684; doi:10.1155/2019/3614207)
Supplement: Supplementary Materials — Table S1: summary of independent validation of the 11-gene signature in 9 datasets. Table S2: list of genes that are consistently deregulated in HGSOC across six datasets using criteria: adjusted p < 0.05 and fold change >1.5. Table S3: the impact of deregulated genes on overall survival (OS). Genes significantly associated with OS are highlighted in yellow. Table S4: top 20 altered gene clusters identified in the 232 deregulated genes that are significantly associated with OS. Gene set enrichment analysis was conducted using Metascape (http://metascape.org). Count represents the number of genes with membership in the given ontology term. “%” represents the percentage of total 232 genes associated with OS that are found in the given ontology term. Log10 (p) is the p-value in log base 10. Table S5: frequency by which each gene appeared in the Cox regression model among 100 resampling training sets. The signature genes are highlighted in yellow. Table S6: the function and role of 11 genes in the prognostic signature in normal and HGSOC cells. Table S7: the average Cox regression coefficient for each gene used to calculate the prognostic score. [file 3614207.f1.zip › 3614207.f1/Supplementary Table 4.xlsx]

## Sheet: Sheet1
Supplementary Table 4. Top 20 altered gene clusters identified in the 232 deregulated genes that are significantly associated with OS. Gene set enrichment analysis was conducted using Metascape (http://metascape.org). Count represents the number of genes with membership in the given ontology term. % represents the percentage of total 232 genes associated with OS that are found in the given ontolo…
Term	Description	LogP	Count	%	Gene Symbols
GO:0051301	cell division	-15.5769	69	29.7414	BBS4,CCND1,BUB1,BUB1B,CCNB1,CCNE1,CDC20,CENPA,CENPF,ECT2,SFN,KIF11,NEK2,TOP2A,VEGFA,CCNE2,SMC4,KIF20A,TACC3,UBE2C,ZWINT,TPX2,FBXL7,GPSM2,PIMREG,NCAPG2,CEP55,SPC25,NCAPG,E2F8,PDGFD,DIXDC1,KIF18B,CHEK1,MKI67,MYBL2,ARHGEF10,DLGAP5,CDKN2A,FEN1,PSMC2,TK1,TUBA4A,HIST1H2AJ,AKT3,NUP210,CENPU,DCN,EZH2,GATA6,PKD2,SFRP1,SOX9,KLF4,SCRIB,DNMT3B,HMGA1,MYB,SNAI2,SNCA,CDKN3,PEA15,PMP22,RAP1GAP,NR2F1,PPIF,KLK8,RU…
GO:0071229	cellular response to acid chemical	-9.78729	36	15.5172	CCNB1,AKR1C2,FOLR1,MYB,PDGFRA,PKD2,SFRP1,SOX9,ZEB1,VEGFA,ALDH1A2,KLF4,KLF2,SESN1,BCL11A,PDGFD,ALAD,GLDC,EZH2,GHR,MEF2C,SNCA,SOCS2,RAB31,LYPD1,DAB2,DCN,GATA4,GATA6,NDN,SNAI2,FLRT2,SHCBP1,COL4A6,EFEMP1,SDC2
GO:0043009	chordate embryonic development	-9.54782	25	10.7759	BBS4,BYSL,CCNB1,EDNRA,ELF3,FOLR1,GATA6,MEF2C,MEOX2,NEK2,PCSK5,PDGFRA,PKD2,SFRP1,SOX9,ZEB1,TFAP2A,VEGFA,ALDH1A2,ZEB2,KLF2,SCRIB,NCAPG2,CENPU,E2F8
GO:0072001	renal system development	-8.54832	31	13.3621	CENPF,DCN,FOXJ1,KCNJ8,MEF2C,PCSK5,PDGFRA,PKD2,SDC1,SFRP1,SOX9,TFAP2A,VEGFA,PAX8,ALDH1A2,CEP55,PDGFD,SNAI2,BCL11A,CCND1,EZH2,SFN,MYCL,ZEB1,ZEB2,DAB2,CELSR2,EDNRA,GATA6,KLF4,BBS4
GO:0030855	epithelial cell differentiation	-8.20336	29	12.5	CCND1,DAB2,AKR1C2,ELF3,EVPL,EZH2,FOXJ1,GATA4,GATA6,SFN,GSTM3,MAF,MEF2C,MYCL,SDC1,SOX9,ZEB1,VEGFA,PAX8,KLF4,ZEB2,KLF2,PDPN,SCRIB,KRT23,EHF,E2F8,CRABP2,AGPAT2
hsa04115	p53 signaling pathway	-7.70221	43	18.5345	CCND1,CCNB1,CCNE1,CDKN2A,CHEK1,SFN,CD82,CCNE2,SESN1,CENPA,CENPF,NEK2,BUB1,BUB1B,CDC20,MYBL2,PSMC2,TK1,TOP2A,AKT3,CDKN3,EZH2,PKD2,KLF4,E2F8,PDGFRA,PDGFD,DYRK2,TPX2,FEN1,UBE2C,COL4A6,HMGA1,HIST1H2AJ,TUBA4A,VEGFA,NUP210,SCRIB,GABARAPL1,MEF2C,PCLAF,POLI,CLEC4M
GO:0001944	vasculature development	-7.29524	28	12.069	DCN,EDNRA,FOLR1,GATA4,GATA6,ITGB8,LEPR,LGALS8,MEF2C,MEOX2,PCSK5,PDGFRA,PKD2,PTGIS,SFRP1,TNFAIP2,VEGFA,RECK,ALDH1A2,KLF4,AKT3,KLF2,PDPN,E2F8,PDGFD,UNC5B,SOX9,ZEB2
GO:1902850	microtubule cytoskeleton organization involved in mitosis	-7.21471	26	11.2069	CCNB1,CDC20,CENPA,KIF11,MYBL2,NEK2,ARHGEF10,TACC3,TPX2,GPSM2,SPC25,BBS4,CHEK1,PKD2,SNCA,TUBA4A,PCLAF,KIF20A,DIXDC1,KIF18B,DLGAP5,KIF15,ECT2,MEF2C,PDGFRA,SFRP1
GO:0035690	cellular response to drug	-7.18679	30	12.931	KLF9,DNMT3B,ECT2,EZH2,FOLR1,KCNH2,MEF2C,MYB,PYCR1,SFRP1,SOX9,KLF4,PPIF,KLF2,BCL11A,PDGFD,LYPD1,PDGFRA,PKD2,SDC1,SESN1,ALAD,CCND1,CCNB1,GSTM3,HBD,MAOB,SNCA,SORD,TFAP2A
GO:0048863	stem cell differentiation	-7.13322	41	17.6724	EDNRA,FOLR1,GATA4,GATA6,GPM6A,MEF2C,MYB,PDGFRA,SFRP1,SNAI2,SOX9,ALDH1A2,ZEB2,DAB2,EZH2,PKD2,PDPN,CCND1,CCNE1,CELSR2,SDC1,SNCA,TLE4,RECK,KLF4,NLGN4X,DIXDC1,EFEMP1,BBS4,ITGB8,MAF,ZEB1,PDGFD,PCSK5,TEAD4,TFAP2A,PAPSS2,ELF3,SCRIB,MTHFD2,FLAD1
GO:0045664	regulation of neuron differentiation	-6.66676	47	20.2586	CDC20,CRABP2,DNMT3B,ECT2,EZH2,L1CAM,MEF2C,MYCL,PMP22,SDC2,SFRP1,SOX9,ZEB1,NR2F1,VEGFA,SOCS2,KLF4,ZEB2,KLK8,RUFY3,BCL11A,DIXDC1,BBS4,CCNB1,GATA4,GATA6,GHR,LEPR,NDN,NPY1R,KLF2,NCAPG2,NLGN4X,MYB,FLRT2,GPM6A,RAP1GAP,PDPN,SFN,CDKN2A,PRAME,TMPRSS4,CELSR2,SNX1,UNC5B,FOLR1,SCRIB
GO:0002009	morphogenesis of an epithelium	-6.63086	41	17.6724	BBS4,DAB2,EDNRA,CELSR2,FOLR1,GATA4,MEF2C,PKD2,SFRP1,SNAI2,SOX9,TFAP2A,VEGFA,PAX8,ALDH1A2,KLF4,ZEB2,PDPN,SCRIB,CCNB1,FOXJ1,GATA6,KCNJ8,NPY1R,PCSK5,PDGFRA,FLRT2,PDLIM3,CRABP2,EFEMP1,ZEB1,RECK,E2F8,MEOX2,CENPF,EZH2,MAOB,AKT3,TACC3,NLGN4X,DIXDC1
GO:0017144	drug metabolic process	-5.67683	23	9.91379	ADH1B,ADH1C,CCNB1,DCN,AKR1C2,FOLR1,GHR,GLDC,HBD,MAOA,MAOB,PKD2,PTGIS,PYCR1,SNCA,ALDH1A2,KLF4,PPIF,KLF2,MTHFD2,DSE,ASRGL1,FLAD1
GO:0033273	response to vitamin	-5.64543	22	9.48276	ALAD,CCND1,DNMT3B,FOLR1,GATA4,SFRP1,SNAI2,ALDH1A2,BBS4,SORD,GABARAPL1,SESN1,BCL11A,CADPS2,ECT2,RAD51AP1,CHEK1,CIRBP,NR2F6,FEN1,PCLAF,SOX9
R-HSA-3560782	Diseases associated with glycosaminoglycan metabolism	-5.61121	17	7.32759	DCN,OMD,OGN,SDC1,SDC2,PAPSS2,SPON1,ALG13,DSE,SORD,NUP210,GSTM3,SNCA,PDE10A,NUDT11,GHR,PAX8
GO:0071407	cellular response to organic cyclic compound	-5.32668	38	16.3793	KLF9,CCNB1,CCNE1,DAB2,DNMT3B,NR2F6,EZH2,FOLR1,MEF2C,SCGB2A1,PKD2,SFRP1,SNAI2,SNCA,NR2F1,TFPI,KLF4,KLF2,CRABP2,PTGIS,ALDH1A2,PRAME,ALAD,CCND1,CLDN4,MAOB,SDC1,BBS4,AKR1C2,GATA6,GHR,LEPR,PAX8,SOCS2,RAB31,LYPD1,MYB,SOX9
GO:0045787	positive regulation of cell cycle	-5.22758	24	10.3448	CCND1,CCNB1,CCNE1,CHEK1,ECT2,EZH2,FEN1,GATA6,SFN,PKD2,CCNE2,DLGAP5,UBE2C,GPSM2,E2F8,BUB1,PEA15,KLF4,TOP2A,CDKN2A,CDKN3,SNAI2,DYRK2,TPX2
R-HSA-109582	Hemostasis	-5.02813	19	8.18966	GATA4,GATA6,GNG11,HBD,KIF11,L1CAM,MYB,PCDH7,SDC1,SDC2,TFPI,TUBA4A,VEGFA,KIF20A,PROCR,PDPN,PDE10A,KIF15,KIF18B
GO:0043065	positive regulation of apoptotic process	-4.92147	19	8.18966	CDKN2A,GSDME,ECT2,SFN,MAL,MEF2C,MYB,MYBL2,PLAGL2,PTGIS,SFRP1,SNCA,TFAP2A,TOP2A,PEA15,ALDH1A2,PPIF,RBM5,SCRIB
GO:0010039	response to iron ion	-4.90156	12	5.17241	ALAD,CCND1,CCNB1,SNCA,TFAP2A,ECT2,MAOB,MEF2C,PKD2,SDC1,SORD,PPIF
