# Supplementary material for: A Robust Gene Expression Prognostic Signature for Overall Survival in High-Grade Serous Ovarian Cancer
Source: J Oncol. 2019 Nov 7;2019:3614207. doi: 10.1155/2019/3614207 (PMC6925684; doi:10.1155/2019/3614207)
Supplement: Supplementary Materials — Table S1: summary of independent validation of the 11-gene signature in 9 datasets. Table S2: list of genes that are consistently deregulated in HGSOC across six datasets using criteria: adjusted p < 0.05 and fold change >1.5. Table S3: the impact of deregulated genes on overall survival (OS). Genes significantly associated with OS are highlighted in yellow. Table S4: top 20 altered gene clusters identified in the 232 deregulated genes that are significantly associated with OS. Gene set enrichment analysis was conducted using Metascape (http://metascape.org). Count represents the number of genes with membership in the given ontology term. “%” represents the percentage of total 232 genes associated with OS that are found in the given ontology term. Log10 (p) is the p-value in log base 10. Table S5: frequency by which each gene appeared in the Cox regression model among 100 resampling training sets. The signature genes are highlighted in yellow. Table S6: the function and role of 11 genes in the prognostic signature in normal and HGSOC cells. Table S7: the average Cox regression coefficient for each gene used to calculate the prognostic score. [file 3614207.f1.zip › 3614207.f1/Supplementary Table 5.xlsx]

## Sheet: Sheet1
Supplementary Table 5 Frequency of genes appeared in Cox regression model among 100 resampling test sets. The signature genes are highlighted in yellow.
RAD51AP1	56
CADPS2	50
DSE	36
ITGB8	28
PDE10A	26
GALNT10	24
SNX1	24
MTHFD2	23
C9orf16	22
PYCR1	22
ARL4C	20
PART1	19
GABARAPL1	17
NPY1R	16
UNC5B	15
GATA4	15
TTC39A	15
CCND1	14
ELF3	14
CD82	14
PCDH7	14
RMND5A	13
ZCCHC24	13
CLDN4	13
MYB	12
TUBA4A	11
LEPR	11
FOXJ1	11
VGLL1	10
SNCA	10
TSPAN15	10
NCAPG2	10
SDC1	9
NDN	8
AKT3	8
SOCS2	8
KIF11	8
ENOX1	8
ZNF671	7
HMGA1	7
C7	7
SRCAP	7
POLI	7
HIST1H2AJ	7
FAM46A	6
PDGFRA	6
SMC4	6
COL4A6	6
PRAME	5
MRPL12	5
TFAP2A	5
SESN1	5
CDC20	5
SHCBP1	5
AGPAT2	5
OGN	5
DNMT3B	5
BYSL	5
FLAD1	5
SFRP1	4
CHEK1	4
GPSM2	4
SMPDL3A	4
RGL1	4
MYCL	4
KCNJ8	4
PTGIS	4
FEN1	4
NEK2	4
GLDC	4
EZH2	4
PAX8	4
FAM153C	4
PCSK5	4
CCNE1	4
GATA6	4
VGLL3	4
CENPU	3
BBS4	3
KLHL4	3
KLK8	3
DAB2	3
ZEB1	3
ALAD	3
TEAD4	3
MAF	3
ARHGEF10	3
CLEC4M	3
VEGFA	3
DFNA5	3
DLGAP5	3
DPP3	3
PCOLCE2	3
GFPT2	3
FJX1	3
CELSR2	3
ASRGL1	3
KLF2	3
TMPRSS4	3
RECK	3
MEOX2	3
OLFML1	3
EHF	3
CENPA	3
PPIF	3
TSPAN8	3
ALG13	3
SFN	2
MEF2C	2
EFEMP1	2
KIF18B	2
SDC2	2
NUDT11	2
N4BP2L1	2
KIF15	2
LGALS8	2
CALB2	2
BCL11A	2
PAPSS2	2
KIAA0368	2
NLGN4X	2
MPZL2	2
BUB1B	2
TFPI	2
KLF4	2
PLAGL2	2
WDFY3	2
TOP2A	2
E2F8	2
LYPD1	2
UGT2B28	2
UBE2C	2
KCNG1	2
MAL	2
KCNH2	2
GIPC2	2
GSTM3	2
SOX9	2
CRABP2	2
PEA15	2
CYB561	2
SPON1	2
ADH1B	1
FAM64A	1
NCAPG	1
NUP210	1
RAB31	1
CEP55	1
MAOB	1
DIXDC1	1
TCEAL2	1
EDNRA	1
ALDH1A2	1
BACH2	1
AKR1C2	1
MREG	1
TK1	1
WBSCR22	1
FOLR1	1
DEFB1	1
GTF2IRD1	1
PDLIM3	1
GHR	1
NR2F6	1
ADAP1	1
MYBL2	1
SNAI2	1
TPX2	1
FBXL7	1
GPM6A	1
ZEB2	1
PKD2	1
KIAA0101	1
TLE4	1
MKI67	1
ZWINT	1
GREB1	1
WFDC2	1
TACC3	1
HOMER2	1
CDKN2A	1
SPC25	1
CP	1
PJA2	1
TLR1	1
MECOM	1
GJB1	1
EVPL	1
TNFAIP2	1
